# Supplementary material for: Social inequalities in low birthweight outcomes in Sri Lanka: evidence from the Demographic and Health Survey 2016
Source: PubMed Central journal article supplement — BMJ Open. 2020 May 25;10(5):e037223. doi: 10.1136/bmjopen-2020-037223 (PMC7252991; doi:10.1136/bmjopen-2020-037223), 2020-05-25
Supplement: bmjopen-2020-037223.draft_revisions.pdf [file bmjopen-2020-037223.draft_revisions.pdf]

# BMJ Open

BMJ Open is committed to open peer review. As part of this commitment we make the peer review history of every article we publish publicly available.

When an article is published we post the peer reviewers' comments and the authors' responses online. We also post the versions of the paper that were used during peer review. These are the versions that the peer review comments apply to.

The versions of the paper that follow are the versions that were submitted during the peer review process. They are not the versions of record or the final published versions. They should not be cited or distributed as the published version of this manuscript.

BMJ Open is an open access journal and the full, final, typeset and author-corrected version of record of the manuscript is available on our site with no access controls, subscription charges or pay-per-view fees (<http://bmjopen.bmj.com>).

If you have any questions on BMJ Open's open peer review process please email [info.bmjopen@bmj.com](mailto:info.bmjopen@bmj.com)

# BMJ Open

## Social inequalities in low birth weight outcomes in Sri Lanka: evidence from the Demographic and Health Survey 2016

|                               |                                                                                                                                                                                                                                                                                |
|-------------------------------|--------------------------------------------------------------------------------------------------------------------------------------------------------------------------------------------------------------------------------------------------------------------------------|
| Journal:                      | <i>BMJ Open</i>                                                                                                                                                                                                                                                                |
| Manuscript ID                 | bmjopen-2020-037223                                                                                                                                                                                                                                                            |
| Article Type:                 | Original research                                                                                                                                                                                                                                                              |
| Date Submitted by the Author: | 28-Jan-2020                                                                                                                                                                                                                                                                    |
| Complete List of Authors:     | Abeywickrama, Gayathri; University of Southampton, Social Sciences: Social Statistics & Demography<br>Padmadas, sabu; University of Southampton, Social Statistics and Demography<br>Hinde, Andrew; University of Southampton, Social Sciences: Social Statistics & Demography |
| Keywords:                     | NUTRITION & DIETETICS, Community child health < PAEDIATRICS, PUBLIC HEALTH, SOCIAL MEDICINE                                                                                                                                                                                    |
|                               |                                                                                                                                                                                                                                                                                |

SCHOLARONE™  
Manuscripts

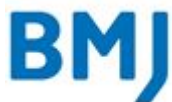

I, the Submitting Author has the right to grant and does grant on behalf of all authors of the Work (as defined in the below author licence), an exclusive licence and/or a non-exclusive licence for contributions from authors who are: i) UK Crown employees; ii) where BMJ has agreed a CC-BY licence shall apply, and/or iii) in accordance with the terms applicable for US Federal Government officers or employees acting as part of their official duties; on a worldwide, perpetual, irrevocable, royalty-free basis to BMJ Publishing Group Ltd ("BMJ") its licensees and where the relevant Journal is co-owned by BMJ to the co-owners of the Journal, to publish the Work in this journal and any other BMJ products and to exploit all rights, as set out in our [licence](#).

The Submitting Author accepts and understands that any supply made under these terms is made by BMJ to the Submitting Author unless you are acting as an employee on behalf of your employer or a postgraduate student of an affiliated institution which is paying any applicable article publishing charge ("APC") for Open Access articles. Where the Submitting Author wishes to make the Work available on an Open Access basis (and intends to pay the relevant APC), the terms of reuse of such Open Access shall be governed by a Creative Commons licence – details of these licences and which [Creative Commons](#) licence will apply to this Work are set out in our licence referred to above.

Other than as permitted in any relevant BMJ Author's Self Archiving Policies, I confirm this Work has not been accepted for publication elsewhere, is not being considered for publication elsewhere and does not duplicate material already published. I confirm all authors consent to publication of this Work and authorise the granting of this licence.

1  
2  
3  
4  
5  
6 **Social inequalities in low birth weight outcomes in Sri Lanka:**  
7  
8 **evidence from the Demographic and health survey 2016**  
9

10  
11  
12  
13 Gayathri Abeywickrama<sup>1</sup>, Sabu S. Padmadas<sup>2</sup>, Andrew Hinde<sup>3</sup>  
14  
15

16  
17 *<sup>1</sup>Department of Social Statistics and Demography, School of Economic, Social and Political Sciences,*  
18 *Faculty of Social Sciences, University of Southampton*

19  
20 *<sup>2</sup> Global Health Research Institute, University of Southampton*

21  
22 *<sup>3</sup> Southampton Statistical Sciences Research Institute, University of Southampton*  
23  
24  
25

26  
27 Paper submitted to the British Medical Journal (BMJ –Open), 12 December, 2019  
28  
29  
30  
31  
32  
33  
34  
35

36 **Correspondence**

37 Dr. Andrew Hinde

38 Department of Social Statistics and Demography

39 School of Economic, Social and Political Sciences

40 Faculty of Social Sciences, University of Southampton

41 Highfield Campus, Southampton SO17 1BJ

42 United Kingdom

43 Email: Andrew.Hinde@soton.ac.uk

44 Tel : + 44 23(0)8059 9631  
45  
46  
47  
48  
49  
50  
51  
52  
53  
54  
55  
56  
57  
58  
59  
60

**Word count** excluding title page, abstract, references, figures and tables :2810

## ABSTRACT

**Objective:** To investigate social inequalities underlying Low Birth Weight (LBW) outcomes in Sri Lanka.

**Design:** Cross-sectional study

**Setting:** This study used the Sri Lanka's Demographic and Health Survey 2016- available since the civil war ended in 2001.

**Participants:** Birth weight data extracted from the child health development records for 7,964 babies born between January 2011 and the date of interview in 2016.

**Outcome measures:** The main outcome variable was classified as LBW ( $= < 2500\text{g}$ ) and normal.

**Methods:** We applied random intercept three-level logistic regression to examine the association between LBW and maternal depletion, socioeconomic and geographic variables. Concentration indices were estimated for different population sub-groups.

**Results:** The population-level prevalence of LBW was 16.9%, significantly higher in the estate sector (28.4%) compared to rural (16.6%) and urban (13.6) areas. Negative concentration indices suggest a relatively higher concentration of LBW in poor households in rural areas and the estate sector. Results from random intercept models confirmed our hypothesis of significant higher risk of LBW outcomes across poorer households and Indian Tamil communities (AOR:1.70, 95% CI:1.02,2.83,  $p < 0.05$ ). There was substantial unobserved variation in LBW outcomes at the mother level. The effect of maternal depletion variables was larger than that of socioeconomic factors.

**Conclusion:** LBW rates are significantly higher among babies born in poorer households and Indian Tamil communities. The findings highlight the need for nutrition interventions targeting pregnant women of Indian Tamil ethnicity and those living in economically deprived households.

**Keywords** Low birth weight; social inequalities; maternal depletion

## ARTICLE SUMMARY

### Strengths and limitations of this study:

- The survey covered the entire island for the first time after the war ended in 2001.
- Birth weight data obtained from child health records and most of the births are institutional deliveries.
- Birth weight data can be biased due to rounding errors or other errors related to weighing instruments.
- Due to data constraints, data on genetic factors and pre-pregnancy weight that could have affected the LBW were not included in the analysis.

## INTRODUCTION

Over the last few decades, Sri Lanka has experienced a marked reduction in infant, child and maternal mortality rates,<sup>1,2</sup> when compared to other South Asian countries. However, there has been little or no progress in child health indicators in Sri Lanka particularly low birth weight (LBW) outcomes, which have hindered the achievement of health-related United Nations Millennium Development Goals.<sup>3</sup> For example, despite the reduction of LBW rates from 22.8% to 16.7% between 1990 and 2000, the percentage of children born with LBW has remained high around 17% since 2000 (Figure 1).<sup>1-4</sup>

LBW is a critical factor associated with neonatal and infant deaths, and nutritional and health outcomes at later stages of child development.<sup>4,5-9</sup> LBW babies are more vulnerable to contracting infections, malnutrition and disability during childhood than those born with normal weight, particularly cognitive disorders related to behaviour and learning.<sup>6</sup> LBW babies who survive infancy are also vulnerable to increased risks of non-communicable and chronic diseases in adulthood.<sup>9-10</sup>

Global and regional variations in LBW rates are pronounced, with the highest burden in low-and middle-income countries, which account for more than 95% of all LBW babies. South Asia has the largest share of LBW babies (48%),<sup>4,11</sup> with the highest rates recorded in Bangladesh, India and Pakistan.<sup>12</sup> Maternal bio-behavioural risk factors such as age, nutritional status, poor diet during pregnancy, body mass index (BMI), gestational age, inter-pregnancy interval, parity, and lack of antenatal care as well as social, economic and environment factors such as poverty and low socioeconomic status are associated with LBW outcomes.<sup>4, 11-15</sup>

High rates of LBW remain a critical public health problem in Sri Lanka, with a long-term impact on health outcomes, disease burden and economic productivity.<sup>16</sup> National health programmes promoting universal access to antenatal care, the multi-sectoral

1  
2  
3 food and micronutrient supplementation programme aligned to the National Nutrition  
4 Policy (2009 – 2013), and the National Health Policy in 2011 – alongside poverty  
5 alleviation programmes were pertinent but contributed little to reducing the incidence  
6 of LBW outcomes.<sup>17</sup> Previous small-scale community studies in Sri Lanka have identified  
7 that the risk of LBW babies is particularly high among mothers in the estate sector.<sup>17-20</sup>  
8 The estate sector comprises mostly Indian Tamil tea plantation workers, who live in the  
9 centre and south of Sri Lanka.<sup>21</sup>  
10  
11  
12  
13  
14  
15  
16

17  
18 Existing studies on LBW have been focused on homogeneous and relatively small  
19 samples in specific settings, for example rural or hospital-based studies. There is little  
20 population-level research on the extent of inequalities in LBW outcome in Sri Lanka. The  
21 present research addresses this gap by analysing the social inequalities underlying LBW  
22 outcomes and associated risk factors in Sri Lanka, based on recent data from a nationally  
23 representative cross-sectional survey. We hypothesise that children born in poor  
24 households and to the Indian Tamil tea plantation workers in the estate sector are more  
25 vulnerable to LBW outcomes than their counterparts living in richer households in  
26 other rural areas, and in towns and cities.  
27  
28  
29  
30  
31  
32  
33  
34  
35

36 [Figure 1 about here]  
37  
38

## 39 **METHODS**

### 40 **Sample**

41  
42 We used data from the Sri Lanka Demographic and Health Survey (SLDHS) conducted  
43 during 2016-2017. This is the first nationally representative sample survey to be  
44 implemented since the civil war ended in 2001. SLDHS used a two-stage stratified  
45 sampling design. A total of 28,800 housing units were selected for the survey. Within  
46 the households 18,302 married women aged 15-49 years were selected for interviews.  
47 SLDHS collected detailed data on birth histories and mothers' reproductive health  
48 behaviours, along with socioeconomic and demographic data. Birth weight data were  
49 extracted from the child health development records for 8,104 babies born between  
50  
51  
52  
53  
54  
55  
56  
57  
58  
59  
60



1  
2  
3 January 2011 and the date of interview in 2016. Of these 8,104 babies, birth weight data  
4 were available for 7,964 babies.  
5  
6  
7  
8

### 9 **Outcome variable**

10 We followed the standard definition of LBW (babies weighing less than 2,500 grams)  
11 but also considered those with a reported birth weight of exactly 2,500 grams,<sup>22</sup> to allow  
12 for potential rounding errors while entering LBW data on child health development  
13 records. For 220 cases (2.6% of the total), birth weight was recorded at exactly 2500  
14 grams. We excluded multiple births (1.7%) and extreme cases of birth weights of 6,500  
15 grams or more (0.36%). Our final analysis sample include 7,713 full-term singleton births  
16 with a recorded birth weight between January 2011 and November 2016 (survey date).  
17  
18  
19  
20  
21  
22  
23  
24  
25

### 26 **Explanatory variables**

27 We grouped the explanatory variables into three categories: maternal depletion;  
28 socioeconomic and geographical. The classification of maternal depletion variables was  
29 on the basis of the theory of maternal depletion syndrome which states that women  
30 with closely-spaced pregnancies are vulnerable to enter the reproductive cycle with  
31 reduced nutrition reserves.<sup>23</sup> Maternal nutrition depletion may lead to negative  
32 outcomes such as low birth weight, infant mortality, and reduced fecundity.<sup>23-25</sup> SLDHS  
33 has limited variables to measuring maternal depletion: maternal age, maternal BMI and  
34 height, preceding birth interval, micronutrient (iron and folic acid tablets) receipt intake  
35 and food supplementation (*Thripasha*) received during pregnancy. We also have data  
36 on the frequency of antenatal care visits and the sex of the child.  
37  
38  
39  
40  
41  
42  
43  
44  
45  
46  
47  
48

49 In addition, we considered the following socioeconomic variables: maternal education,  
50 a household wealth index as a proxy for measuring socioeconomic status, and ethnicity.  
51 Finally, we considered two key geographic variables: residence in the urban, rural or  
52 estate sectors, and the province in where the birth took place.  
53  
54  
55  
56  
57  
58  
59  
60

## Statistical analysis

We examined the binary association between birth weight and selected characteristics. The outcome variable is coded 0 (reference) for babies with normal weight and 1 for those weighing 2,500 grams or less. Then we fit a series of binary logistic regression models. Model 1 includes maternal depletion variables, Model 2 includes maternal depletion and socioeconomic variables, and Model 3 includes maternal depletion, socioeconomic variables and geographical variables. The variance inflation factor is used to check for collinearity and to ensure that the assumptions of multicollinearity are not violated. Due to the hierarchical nature of the data, with some mothers having more than one child, and mothers grouped within communities (primary sampling units or clusters), we examine the variation in LBW at three levels: child, mother and community.

Model 1 included maternal depletion variables, Model 2 included material depletion and socioeconomic variables, and Model 3 included maternal depletion, socioeconomic variables and geographical variables. The variance inflation factor was used to check for collinearity and to ensure that the assumptions of multicollinearity were not violated. Due to the hierarchical nature of the data, with some mothers having more than one child, and mothers grouped within communities (primary sampling units or clusters), we examine the variation in LBW at three levels: child, mother and community.

Additionally, we estimated concentration indices to measure the extent of wealth inequalities underlying LBW, which are illustrated graphically using concentration curves.

## RESULTS

### Descriptive analysis

Table 1 shows the statistical association between birth weight and selected variables. About 17% of babies were born with a LBW and the rate was significantly higher among

1  
2  
3 babies born in the estate sector (28.4%) when compared to rural (16.6%) and urban  
4 (13.6) areas. LBW was concentrated among teenage and young mothers aged under 20  
5 and 20 -24 years. There is a positive association between maternal anthropometric  
6 measures (BMI and height) and LBW. The association between LBW and the number of  
7 antenatal visits is marginal. There was no significant association between LBW and  
8 receipt of *Thripasha* during pregnancy. However, LBW was relatively common among  
9 mothers who have not had iron and folic acid supplements. Female babies were more  
10 likely than male babies to be born with LBW. Among the socioeconomic characteristics,  
11 the prevalence of LBW was inversely related to educational attainment and household  
12 wealth. For example, 21.4% of mothers in the lowest wealth quintile had low birth weight  
13 babies, compared with only around half that proportion among the highest wealth  
14 quintile. Indian Tamils were more likely than the other ethnic groups to have LBW  
15 babies, and mothers living in the estate sector generally have a higher proportion of  
16 LBW babies (28.4%) compared with their counterparts living in rural and urban areas.  
17 LBW was common in Central and Sabaragamuwa regions and less pronounced in  
18 northern region.  
19  
20  
21  
22  
23  
24  
25  
26  
27  
28  
29  
30  
31  
32  
33  
34  
35  
36  
37  
38  
39  
40  
41  
42  
43  
44  
45  
46  
47  
48  
49  
50  
51  
52  
53  
54  
55  
56  
57  
58  
59  
60

**Table 1**

**Percentage distribution of recorded birth weight by maternal depletion, socioeconomic and geographical factors: Sri Lanka, 2016**

| Variable and category                        | Birth weight (in grams) |             |             |             | Number of births |
|----------------------------------------------|-------------------------|-------------|-------------|-------------|------------------|
|                                              | <=2500                  | 2501-3000   | 3001-3500   | 3501-6500   |                  |
| <b>All</b>                                   | <b>16.9</b>             | <b>38.0</b> | <b>34.9</b> | <b>10.2</b> | <b>7,713</b>     |
| <b>Maternal age (years)</b>                  |                         |             |             |             |                  |
| Under 20                                     | 25.6                    | 39.1        | 31.0        | 4.0         |                  |
| 20-24                                        | 19.7                    | 41.9        | 31.2        | 7.1         | 1,012            |
| 25-34                                        | 16.1                    | 37.8        | 35.9        | 10.0        | 4,468            |
| 35-39                                        | 16.2                    | 36.1        | 34.2        | 13.2        | 1,622            |
| 40 and over                                  | 18.4                    | 36.5        | 35.3        | 9.6         | 537              |
| <b>Maternal body mass index</b>              |                         |             |             |             |                  |
| Under 18.5                                   | 26.4                    | 45.5        | 24.4        | 3.5         | 847              |
| 18.5-24.9                                    | 17.2                    | 39.9        | 33.9        | 8.8         | 3,726            |
| 25.0-29.9                                    | 14.1                    | 33.9        | 38.4        | 13.5        | 2,171            |
| 30.0 or more                                 | 11.8                    | 31.9        | 40.1        | 15.9        | 801              |
| <b>Maternal height</b>                       |                         |             |             |             |                  |
| Short (up to 145.0 cm)                       | 28.8                    | 41.2        | 24.5        | 5.3         | 545              |
| Average (145.1-155.0 cm)                     | 18.5                    | 39.6        | 32.9        | 8.7         | 4,198            |
| Tall (155.1 cm and over)                     | 12.0                    | 34.8        | 39.5        | 13.5        | 2,821            |
| <b>Antenatal visits</b>                      |                         |             |             |             |                  |
| Fewer than 3 times                           | 16.9                    | 38.2        | 35.7        | 9.0         | 1378             |
| 3-5 times                                    | 24.0                    | 37.1        | 30.6        | 8.1         | 737              |
| 6-10 times                                   | 16.1                    | 38.1        | 35.0        | 10.6        | 5,314            |
| 11 or more times                             | 12.3                    | 36.2        | 38.3        | 13.0        | 284              |
| <b>Received <i>Thripasha</i></b>             |                         |             |             |             |                  |
| Received and consumed                        | 18.5                    | 43.8        | 30.5        | 7.3         | 504              |
| Received and shared                          | 17.0                    | 37.5        | 34.8        | 10.5        | 5,921            |
| Not received                                 | 9.7                     | 40.7        | 37.8        | 11.6        | 103              |
| <b>Taken iron and folic acid supplements</b> |                         |             |             |             |                  |
| Received and consumed                        | 16.5                    | 38.1        | 35.0        | 10.3        | 6,503            |
| Not received and consumed                    | 25.7                    | 36.0        | 26.6        | 11.5        | 1,210            |
| <b>Sex of child</b>                          |                         |             |             |             |                  |
| Male                                         | 15.1                    | 37.4        | 36.3        | 11.3        | 4,000            |
| Female                                       | 18.7                    | 38.8        | 33.5        | 9.0         | 3,794            |
| <b>Preceding birth interval</b>              |                         |             |             |             |                  |
| First birth                                  | 19.5                    | 40.6        | 32.0        | 7.7         | 3,011            |
| Under 24 months                              | 14.9                    | 34.5        | 36.5        | 13.9        | 394              |
| 24-47 months                                 | 12.7                    | 35.5        | 39.1        | 12.5        | 1,594            |
| 48-59 months                                 | 15.2                    | 35.3        | 36.4        | 12.9        | 793              |
| 60 months or more                            | 17.3                    | 37.5        | 34.8        | 10.3        | 1,931            |

**Table 1 (contd.)**  
**Percentage distribution of recorded birth weight by maternal depletion, socioeconomic and geographical factors: Sri Lanka, 2016**

| Variable and category            | Birth weight (in grams) |           |           |           | Number of births |
|----------------------------------|-------------------------|-----------|-----------|-----------|------------------|
|                                  | <=2500                  | 2501-3000 | 3001-3500 | 3501-6500 |                  |
| <b>Education level</b>           |                         |           |           |           |                  |
| No education and primary         | 27.6                    | 40.2      | 24.7      | 7.3       | 380              |
| Secondary and passed GCE O-level | 18.0                    | 38.4      | 33.7      | 9.7       | 5,127            |
| Passed GCE A-level               | 11.6                    | 39.0      | 38.0      | 11.2      | 1,761            |
| Degree and above                 | 15.0                    | 26.2      | 44.7      | 13.9      | 445              |
| <b>Wealth index</b>              |                         |           |           |           |                  |
| Poorest                          | 21.4                    | 40.6      | 29.8      | 8.0       | 1,900            |
| Poor                             | 17.8                    | 38.0      | 35.3      | 8.7       | 1,571            |
| Middle                           | 17.9                    | 38.5      | 33.2      | 10.2      | 1,460            |
| Rich                             | 14.1                    | 36.5      | 37.8      | 11.4      | 1,514            |
| Richest                          | 10.8                    | 34.9      | 40.3      | 13.8      | 1,268            |
| <b>Ethnicity</b>                 |                         |           |           |           |                  |
| Sinhala                          | 17.2                    | 38.0      | 34.5      | 10.0      | 5,025            |
| Sri Lanka Tamil                  | 15.9                    | 36.4      | 36.8      | 10.8      | 1,564            |
| Indian Tamil                     | 32.6                    | 42.5      | 23.5      | 1.2       | 242              |
| Muslim                           | 12.1                    | 38.6      | 36.7      | 12.4      | 857              |
| Burgher and Malay                | 12.0                    | 48.0      | 28.0      | 12.0      | 25               |
| <b>Residential sector</b>        |                         |           |           |           |                  |
| Urban                            | 13.6                    | 34.4      | 38.5      | 13.2      | 1,249            |
| Rural                            | 16.6                    | 38.1      | 35.2      | 10.0      | 5,972            |
| Estate                           | 28.4                    | 45.1      | 21.9      | 4.4       | 492              |
| <b>Province</b>                  |                         |           |           |           |                  |
| Western                          | 14.5                    | 37.8      | 36.5      | 11.1      | 1,455            |
| Central                          | 20.2                    | 38.8      | 32.7      | 8.3       | 996              |
| Southern                         | 16.4                    | 38.1      | 34.3      | 11.0      | 923              |
| Northern                         | 12.0                    | 34.4      | 40.3      | 13.1      | 905              |
| Eastern                          | 17.0                    | 37.5      | 35.0      | 10.3      | 857              |
| North-Western                    | 17.1                    | 34.9      | 35.7      | 12.1      | 832              |
| North Central                    | 14.3                    | 42.4      | 33.2      | 10.0      | 530              |
| Uva                              | 18.7                    | 41.0      | 35.1      | 4.9       | 543              |
| Sabaragamuwa                     | 24.1                    | 39.7      | 27.9      | 8.1       | 672              |

Source: Sri Lanka Demographic and Health Survey 2016.

1  
2  
3 The socioeconomic differentials are further illustrated in the concentration curves  
4 (Figures 2a and 2b). A concentration index ranges in value between -1 and +1. Negative  
5 values indicate that the variable is concentrated in poor households, a value of zero  
6 indicates there is no inequality and positive values indicate that the variable is  
7 concentrated in the richest households. The concentration curve is a graphical  
8 exploration of the concentration index. If the concentration curve lies on the diagonal  
9 45 degree line it shows perfect equality; when it lies below the line, the outcome is more  
10 concentrated among the rich sections of the population; if it lies above the 45 degree  
11 line, the outcome is more concentrated among the poor individuals in the population.<sup>26</sup>  
12  
13  
14  
15  
16  
17  
18  
19  
20  
21

22 The results for LBW show a concentration index of -0.13 (95% CI: -0.15, -0.10),  
23 suggesting that LBW is concentrated among the poorer households (Figure 2a). The  
24 curve shows that, for example, the poorest 20% of households have about 30% of LBW  
25 babies whereas the richest 20% of households have only about 10% of LBW babies. We  
26 graphed concentration curves by residential sector (Figure 2b). The results show that  
27 that inequality within each sector is less than inequality overall and that, in particular,  
28 there is equality of LBW outcomes within the estate sector. This may be because the  
29 estate sector consists very largely of poor households.  
30  
31  
32  
33  
34  
35  
36  
37  
38  
39  
40

41 [Figures 2a and 2b about here]  
42  
43

### 44 **Regression analysis**

45 Table 2 shows the results of fixed effects logistic regression models with LBW as the  
46 outcome. In Model 1 we included only maternal depletion variables. Mothers with a low  
47 BMI were more likely to have a low birth weight baby than those with normal BMI levels  
48 (adjusted odds ratio AOR: 1.76, 95%CI: 1.41–2.20). There is a strong inverse association  
49 between maternal height and LBW outcome. Mothers who did not consume iron or folic  
50 acid (AOR=1.48, 95%CI: 1.02-2.14) and those with a female birth (AOR = 1.39, 95%CI:  
51 1.19-1.63) were more likely to have a LBW baby than those who did not consume iron  
52 or folic acid or who has a male baby, respectively. Babies birth 24-47 month after their  
53  
54  
55  
56  
57  
58  
59  
60

1  
2  
3 immediately elder sibling were at lower risk of having LBW than babies born after  
4 shorter or longer intervals.  
5  
6  
7

8  
9 Model 2 added socioeconomic variables. Although the odds ratios for the maternal  
10 depletion variables in Models 1 and 2 cannot properly be compared, there was little or  
11 no change in the effect of the maternal depletion variables. Household wealth was a  
12 strong predictor of LBW outcome: babies born in the highest household wealth quintile  
13 had half the odds of LBW compared with those in the lowest quintile (AOR: 0.50, 95%CI:  
14 0.36–0.69). Maternal education level was less important, although mothers with higher  
15 levels of education tended to have reduced odds of a LBW baby. There were some  
16 differences by ethnicity: Burgher and Malay mothers were less likely to have LBW babies,  
17 whereas the Indian Tamils were more likely to have LBW outcomes than Sinhala  
18 mothers.  
19  
20  
21  
22  
23  
24  
25  
26  
27  
28  
29  
30  
31  
32  
33  
34  
35  
36  
37  
38  
39  
40  
41  
42  
43  
44  
45  
46  
47  
48  
49  
50  
51  
52  
53  
54  
55  
56  
57  
58  
59  
60

**Table 2**  
**Results of the fixed effects multiple logistic regression**

| Variable and category                        | Model 1                         | Model 2                         | Model 3                         |
|----------------------------------------------|---------------------------------|---------------------------------|---------------------------------|
|                                              | Adjusted odds ratio<br>(95% CI) | Adjusted odds ratio<br>(95% CI) | Adjusted odds ratio<br>(95% CI) |
| <b>Maternal body mass index</b>              |                                 |                                 |                                 |
| Under 18.5                                   | 1.76 (1.41-2.20)***             | 1.62 (1.29-2.03)***             | 1.63 (1.31-2.03)***             |
| 18.5-24.9                                    | 1.00                            | 1.00                            | 1.00                            |
| 25.0-29.9                                    | 0.78 (0.65-0.95)*               | 0.83 (0.69-1.00)                | 0.85 (0.71-1.03)                |
| 30.0 or more                                 | 0.73 (0.55-0.96)*               | 0.80 (0.60-1.06)                | 0.74 (0.56-0.98)*               |
| <b>Maternal height</b>                       |                                 |                                 |                                 |
| Short (up to 145.0 cm)                       | 1.91 (1.47-2.74)***             | 1.76 (1.36-2.29)***             | 1.74 (1.35-2.24)***             |
| Average (145.1-155.0 cm)                     | 1.00                            | 1.00                            | 1.00                            |
| Tall (155.1 cm and over)                     | 0.55 (0.46-0.66)***             | 0.58 (0.49-0.70)                | 0.58 (0.49-0.69)***             |
| <b>Antenatal care visits</b>                 |                                 |                                 |                                 |
| Fewer than 3 times                           | 1.30 (0.79-2.15)                | 1.43 (0.86-2.37)                | 1.25 (0.81-1.93)                |
| 3-5 times                                    | 1.73 (1.09-2.73)*               | 1.78 (1.11-2.85)*               | 1.75 (1.09-2.81)*               |
| 6-10 times                                   | 1.13 (0.75-1.70)                | 1.14 (0.75-1.72)                | 1.15 (0.76-1.74)                |
| 11 or more times                             | 1.00                            | 1.00                            | 1.00                            |
| <b>Taken iron and folic acid supplements</b> |                                 |                                 |                                 |
| Received and consumed                        | 1.00                            | 1.00                            |                                 |
| Not received and consumed                    | 1.48 (1.02-2.14)*               | 1.43 (0.98-2.08)                |                                 |
| <b>Sex of child</b>                          |                                 |                                 |                                 |
| Male                                         | 1.00                            | 1.00                            | 1.00                            |
| Female                                       | 1.39 (1.19-1.63)***             | 1.40 (1.20-1.64)***             | 1.45(0.16-1.67)***              |
| <b>Preceding birth interval</b>              |                                 |                                 |                                 |
| First birth                                  | 1.00                            | 1.00                            | 1.00                            |
| Under 24 months                              | 0.68 (0.47-0.98)*               | 0.67 (0.46-0.96)*               | 0.73 (0.52-1.04)                |
| 24-47 months                                 | 0.58 (0.46-0.73)***             | 0.56 (0.44-0.70)***             | 0.59 (0.48-0.73)***             |
| 48-59 months                                 | 0.77 (0.59-1.08)                | 0.73 (0.56-0.96)*               | 0.77 (0.59-0.99)*               |
| 60 months or more                            | 0.92 (0.76-1.18)                | 0.85 (0.70-1.04)                | 0.87 (0.72-1.05)                |
| <b>Education level</b>                       |                                 |                                 |                                 |
| No education and primary                     |                                 | 1.00                            | 1.00                            |
| Secondary and passed GCE O-level             |                                 | 0.75 (0.55-1.03)                | 0.80 (0.58-1.10)                |
| Passed GCE A-level                           |                                 | 0.58 (0.40-0.84)**              | 0.63 (0.44-0.90)*               |
| Degree and above                             |                                 | 0.90 (0.57-1.44)                | 0.92 (0.58-1.46)                |
| <b>Wealth index</b>                          |                                 |                                 |                                 |
| Poorest                                      |                                 |                                 | 1.00                            |
| Poor                                         |                                 | 0.82 (0.65-1.04)                | 0.82 (0.65-1.03)                |
| Middle                                       |                                 | 0.81 (0.64-1.02)                | 0.84 (0.66-1.07)                |
| Rich                                         |                                 | 0.73 (0.56-0.94)*               | 0.74 (0.58-0.96)*               |
| Richest                                      |                                 | 0.50 (0.36-0.69)***             | 0.54 (0.40-0.73)***             |



**Table 2 (contd.)**  
**Results of the fixed effects multiple logistic regression**

| Variable and category | Model 1                         | Model 2                         | Model 3                         |
|-----------------------|---------------------------------|---------------------------------|---------------------------------|
|                       | Adjusted odds ratio<br>(95% CI) | Adjusted odds ratio<br>(95% CI) | Adjusted odds ratio<br>(95% CI) |
| <b>Ethnicity</b>      |                                 |                                 |                                 |
| Sinhala               |                                 | 1.00                            | 1.00                            |
| Sri Lankan Tamil      |                                 | 0.85 (0.68-1.05)                | 1.03 (0.74-1.43)                |
| Indian Tamil          |                                 | 1.48 (1.03-2.13)*               | 1.70 (1.02-2.83)*               |
| Muslims               |                                 | 0.82 (0.61-1.11)                | 0.86 (0.63-1.18)                |
| Burgher and Malay     |                                 | 0.54 (0.16-1.77)                | 0.43 (0.13-1.45)                |
| <b>Sector</b>         |                                 |                                 |                                 |
| Urban                 |                                 |                                 | 1.00                            |
| Rural                 |                                 |                                 | 0.97 (0.77-1.23)                |
| Estate                |                                 |                                 | 1.06 (0.66-1.68)                |
| <b>Province</b>       |                                 |                                 |                                 |
| Western               |                                 |                                 | 1.00                            |
| Central               |                                 |                                 | 0.99 (0.74-1.32)                |
| Southern              |                                 |                                 | 1.05 (0.78-1.41)                |
| Northern              |                                 |                                 | 0.60 (0.38-0.94)*               |
| Eastern               |                                 |                                 | 1.06 (0.76-1.47)                |
| North-Western         |                                 |                                 | 1.16 (0.89-1.51)                |
| North Central         |                                 |                                 | 0.93 (0.64-1.24)                |
| Uva                   |                                 |                                 | 0.89 (0.63-1.24)                |
| Sabaragamuwa          |                                 |                                 | 1.42 (1.07-1.87)*               |

\*\*\* $p < 0.001$ ; \*\* $p < 0.01$ ; \* $p < 0.05$

The final model included the geographical variables residential sector and province in addition to maternal and socioeconomic factors. We removed the iron and folic acid variable from the model, as it was no longer significant in Model 2. Both maternal and socioeconomic factors remain important predictors of LBW, however, residential sector was less important. The effect of Indian Tamil ethnicity remained significant with a higher odds (AOR: 1.70, 95%CI: 1.02–2.83). Similarly, mothers who lived in Sabaragamuwa province had higher odds of LBW than those from the Western province (AOR: 1.42, 95%CI: 1.07–1.87). LBW babies were more common among Indian Tamils than among other ethnic groups. The Indian Tamils lived and worked mostly at tea plantation estates in Sabaragamuwa province.

### Random effects

Our data are hierarchical, in that some quantities are specific to children, whereas others are defined and measured at the mother level and yet others, such as provinces are defined at a broader community level. It might be that characteristics of mothers and/or communities lead to the risk of low birth weight among children born to the same mother, or born within the same community, being correlated. Some of these characteristics can be observed (for example mother's BMI) but others (for example genetic factors) cannot be observed. To assess the magnitude of these correlation effects we estimated a model of low birth weight with no covariates, but three variance parameters at the child level, the mother level and the community level. We found very little correlation between the risk of low birth weight for babies within the same community, but substantial correlation between the risk of low birth weight for children of the same mother. More than 60% of the variance in LBW is the result of variation between mothers. This suggests that any community-level effects were those deriving from the characteristics of mothers living in the same community.

To take account of this mother-level variation we re-estimated Model 3 described above adding a random effect at the mother level. The results are shown in Table 3. The effect of the covariates is similar to that in the comparable fixed effects model, though in some cases (for example maternal height) their impact is amplified.

**Table 3**  
**Results of the two-level random intercept logistic regression model**

| Variable and category                  | Adjusted odds ratio (95% CI) |
|----------------------------------------|------------------------------|
| <b>Maternal body mass index</b>        |                              |
| Under 18.5                             | 2.14 (1.48-3.09)***          |
| 18.5-24.9                              | 1.00                         |
| 25.0-29.9                              | 0.71 (0.54-0.94)*            |
| 30.0 or more                           | 0.60 (0.39-0.91)*            |
| <b>Maternal height</b>                 |                              |
| Short (up to 145.0 cm)                 | 2.48 (1.60-3.83)***          |
| Average (145.1-155.0 cm)               | 1.00                         |
| Tall (155.1 cm and over)               | 0.44 (0.32-0.57)***          |
| <b>Number of antenatal care visits</b> |                              |
| Fewer than 3 times                     | 1.65 (0.84-3.24)             |
| 3-5 times                              | 2.79 (1.35-5.30)**           |
| 6-10 times                             | 1.41 (0.75-2.64)             |
| 11 times or more                       | 1.00                         |
| <b>Sex of child</b>                    |                              |
| Male                                   | 1.00                         |
| Female                                 | 1.55 (1.24-1.95)***          |
| <b>Preceding birth interval</b>        |                              |
| First birth                            | 1.00                         |
| Under 24 months                        | 0.55 (0.32-0.92)*            |
| 24-47 months                           | 0.46 (0.33-0.63)***          |
| 48-59 months                           | 0.61 (0.40-0.90)*            |
| 60 months or more                      | 0.74 (0.55-0.98)*            |
| <b>Educational category</b>            |                              |
| No education and primary               | 1.00                         |
| Secondary and passed GCE O-level       | 0.59 (0.36-0.98)*            |
| Passed GCE A-level                     | 0.38 (0.21-0.70)**           |
| Degree and above                       | 0.76 (0.36-1.59)             |
| <b>Wealth index quintile</b>           |                              |
| Lowest                                 | 1.00                         |
| Second                                 | 0.77 (0.54-1.08)             |
| Middle                                 | 0.81 (0.55-1.17)             |
| Fourth                                 | 0.63 (0.41-0.93)*            |
| Highest                                | 0.43 (0.25-0.70)**           |
| <b>Ethnicity</b>                       |                              |
| Sinhala                                | 1.00                         |
| Sri Lankan Tamil                       | 0.91 (0.60-1.38)             |
| Indian Tamil                           | 2.13 (1.12-4.06)*            |
| Muslims                                | 0.71 (0.46-1.08)             |
| Burgher and Malay                      | 0.72 (0.08-5.90)             |

**Table 3 (contd.)**  
**Results of the two-level random intercept logistic regression model**

| Variable and category                  | Adjusted odds ratio (95% CI) |
|----------------------------------------|------------------------------|
| <b>Province</b>                        |                              |
| Western                                | 1.00                         |
| Central                                | 1.25 (0.81-1.91)             |
| Southern                               | 1.02 (0.66-1.58)             |
| Northern                               | 0.66 (0.37-1.17)             |
| Eastern                                | 1.27 (0.78-2.06)             |
| North-Western                          | 1.36 (0.88-2.11)             |
| North Central                          | 0.90 (0.53-1.52)             |
| Uva                                    | 0.96 (0.55-1.63)             |
| Sabaragamuwa                           | 1.82 (1.14-2.89)*            |
| Mother-level variance (standard error) | 2.40 (0.324)***              |
| Intra-cluster correlation coefficient  | 0.63                         |
| Log likelihood                         | -2,831.6426                  |
| Akaike information criterion (AIC)     | 5,735.285                    |
| Bayes information criterion (BIC)      | 5,983.016                    |

\*\*\* $p < 0.001$ ; \*\* $p < 0.01$ ; \* $p < 0.05$

## DISCUSSION

Our findings confirm the research hypothesis of a clear socioeconomic gradient in the risk of LBW in Sri Lanka. Mothers from poor households, especially those from Indian Tamil communities living in the estate sector, have increased risk of LBW babies. The persistence of low birth weight among this group might be attributed to genetic factors deriving from the selected group of poor and destitute Indian Tamils who were originally brought to work in the tea plantations in the nineteenth century.<sup>20</sup> There is a lack of research on genetic causes of LBW in Sri Lanka, and a more thorough investigation of the genetic factors associated with LBW is needed.

The foregoing analyses of SLDHS data confirm the prominent role of maternal factors in determining LBW outcomes. Maternal depletion factors such as maternal BMI and height, and preceding birth interval were more influential in determining LBW than

1  
2  
3 socioeconomic and geographical factors. Multilevel analysis revealed that more than  
4 60% of the variation in LBW occurred at the maternal level. Once this had been  
5 accounted for, there was very little additional variation (6% of the total) at the  
6 community level. Birth weights of children born to the same mother were highly  
7 correlated, partly reflecting the impact of unmeasured factors such as genetic and  
8 environmental factors that were not taken into account in the fixed effect model.  
9  
10  
11  
12  
13  
14  
15

16  
17 Our findings highlight the need for nutrition interventions targeting pregnant women  
18 from the Indian Tamil ethnicity living in economically deprived households. The  
19 government in Sri Lanka has taken several measures to improve the nutritional status of  
20 pregnant mothers, particularly the free distribution of *Thriposha* targeted at poor  
21 families. However, the effect of receiving and consuming *Thriposha* was not significant,  
22 consistent with findings from previous research.<sup>20</sup> This might be due to the fact that  
23 *Thriposha* fulfils only 400 kcal of energy needs,<sup>27</sup> which is not adequate for  
24 undernourished mothers<sup>28</sup> or an inability to identify true recipients of it. The present  
25 study suggests revisiting the effectiveness of *Thriposha* programme in addressing the  
26 nutritional needs of mothers. The other existing poverty alleviation programme in Sri  
27 Lanka is *Samurdhi* (prosperity), launched in 1994. This also only provides a modest  
28 quantity of monetary support (only 500-1,000 rupees), and does not always target the  
29 right beneficiaries.<sup>29-30</sup>  
30  
31  
32  
33  
34  
35  
36  
37  
38  
39  
40  
41  
42  
43  
44  
45  
46  
47  
48  
49  
50  
51  
52  
53  
54  
55  
56  
57  
58  
59  
60

LBW is concentrated among poor people, especially within the estate sector. Hence, to  
be more effective in reducing the prevalence of LBW, the *Samurdhi* programme should  
be expanded to target the poorest mothers in the estate sector. Since the maternal level  
is more influential in determining LBW in the context of Sri Lanka, policies should be  
more centred on improving maternal factors including nutritional level.

1  
2  
3 The present research is based on cross-sectional data at the national level, which has  
4 been collected for the first time after the war and civil conflict in Sri Lanka. The analysis  
5 is based on data from health records, which are fairly accurate in Sri Lanka where  
6 institutional birth is universal. However, previous studies show that birth weight data  
7 may be biased due to rounding errors or other errors related to weighing instruments  
8 even in hospital settings.<sup>31,32</sup> SLDHS has several limitations. There are no data on genetic  
9 factors and gestational age as well as on nutrition/dietary intake before, during and  
10 after pregnancy. However, maternal anthropometric data offer useful proxies to assess  
11 the relationship between maternal nutritional status and LBW outcomes. SLDHS has also  
12 no data on gestational weight gain and pre-pregnancy weight: the present study used  
13 height and weight data measures at the time of the survey to calculate BMI values. On  
14 the other hand, maternal weight before and after pregnancy may differ considerably.  
15 Therefore, it is recommended that future studies consider both anthropometric  
16 measures and pre-gestational BMI to examine if there is a relationship with birth weight.  
17  
18  
19  
20  
21  
22  
23  
24  
25  
26  
27  
28  
29  
30  
31  
32  
33  
34  
35  
36  
37  
38  
39  
40  
41  
42  
43  
44  
45  
46  
47  
48  
49  
50  
51  
52  
53  
54  
55  
56  
57  
58  
59  
60

1  
2  
3  
4  
5 **Acknowledgement** Authors wish to thank Department of Census and Statistics in Sri  
6 Lanka for granting permission to access DHS data.  
7

8 **Contributorship** All authors have substantially contributed to this manuscript.  
9

10 **Funding** None to declare  
11

12 **Competing Interests** None to declare  
13

14 **Ethical Approval** Ethical approval was granted from the Ethics Research and  
15 Governance unit of the University of Southampton (reference: 42179).  
16

17 **Patient and Public Involvement.** This research was done without patient or public  
18 involvement. Patients were not invited to comment on the study design and were not  
19 consulted to develop patient relevant outcomes or interpret the results. Patients were  
20 not invited to contribute to the writing or editing of this document for readability or  
21 accuracy.  
22

23 **Data availability.** The data are not publicly available but can be obtained through  
24 written request to the Department of Census and Statistics in Sri Lanka  
25

## 26 27 28 29 30 31 **Figure legends**

32 Figure 1. Percentage of babies with low birth weight in Sri Lanka: 1990-2017  
33

34 Figure 2a. Concentration curve showing the cumulative proportion of low birth weight  
35 by wealth quintiles  
36

37 Figure 2b. Concentration curves showing the cumulative proportion of low birth  
38 weight by residential sector  
39  
40  
41  
42  
43  
44  
45  
46  
47  
48  
49  
50  
51  
52  
53  
54  
55  
56  
57  
58  
59  
60

## References

1. Department of Census and Statistics. *Demographic and Health Survey 2016*. Colombo: Department of Census and Statistics, Sri Lanka, 2017.
2. World Bank. *Sri Lanka: Attaining the Millennium Development Goals in Sri Lanka*. Washington DC: World Bank Human Development Unit, South Asia Region, 2005. <https://openknowledge.worldbank.org/bitstream/handle/10986/8635/321340LK.pdf?sequence=1&isAllowed=y> [accessed 10 June 2019].
3. World Health Organization. *Paradox of Healthcare in Sri Lanka: a Snapshot of the Last Decade from a Partnership of Sixty Years*. Colombo: World Health Organization. 2014. <https://apps.who.int/iris/bitstream/handle/10665/255195/ParadoxofhealthcareinSri%20Lanka.pdf?sequence=1&isAllowed=y> [accessed 10 June 2019].
4. World Health Organization. *Global Nutrition Targets 2025: Low Birth Weight Policy Brief*. Geneva: World Health Organization, 2014. [https://www.who.int/nutrition/topics/globaltargets\\_lowbirthweight\\_policybrief.pdf](https://www.who.int/nutrition/topics/globaltargets_lowbirthweight_policybrief.pdf) [accessed 10 April 2019].
5. Barker DJP. *Mothers, Babies and Health in Later Life* (2nd ed.). Edinburgh: Churchill Livingstone, 1998.
6. Hack M, Klein NK, Taylor HG. Long-term developmental outcomes of low birth weight infants. *The Future Children* 1995, 5: 176-96. doi:10.2307/1602514
7. Khan A, Nasrullah FD, Jaleel R. Frequency and risk factors of low birth weight in term pregnancy. *Pakistan Journal of Medical Sciences* 2006, 32: 138-42. doi:10.12669/pjms.321.8120
8. Kramer MS. Determinants of low birth weight: methodological assessment and meta-analysis. *Bulletin of the World Health Organization* 1987, 65: 663-737. doi:1987;65(5):663-737
9. Fall CHD. Fetal programming and the risk of noncommunicable disease. *Indian Journal of Pediatrics* 2013, 80 Supplement: S13-S20. doi:<https://doi.org/10.1007/s12098-012-0834-5>
10. Sivasankaran S, Thankappan KR. Prevention of non-communicable diseases requires a life course approach: a case study from Kerala. *Indian Journal of Medical Research* 2013, 137: 874-7. PMID: 23760370; PMCID: PMC3734676
11. Mahumud RA, Sultana M, Sarker AR. *Distribution and determinants of low birth weight in developing countries*. *Journal of Preventive Medicine and Public Health* 2017, 50: 18-28. doi:10.3961/jpmph.16.087.



12. Leon DA, Moser KA. Low birth weight persists in South Asian babies born in England and Wales regardless of maternal country of birth. Slow pace of acculturation, physiological constraint or both? Analysis of routine data. *Journal of Epidemiology and Community Health* 2012, 66: 544-51.
13. Bian Y, Zhang Z, Liu Q, Wu D, Wang S. Maternal risk factors for low birth weight for term births in a developed region in China: a hospital-based study of 55,633 pregnancies. *Journal of Biomedical Research* 2013, 27(1): 14-22.  
doi: 10.7555/JBR.27.20120046
14. Dahlui M, Azahar N, Oche OM, Aziz NA. Risk factors for low birth weight in Nigeria: evidence from the 2013 Nigeria Demographic and Health Survey. *Global Health Action* 2016, 9:1.  
doi: 10.3402/gha.v9.28822
15. Kader M, Perera NK. Socio-economic and nutritional determinants of low birth weight in India. *North American Journal of Medical Science* 2014, 6: 302-8.  
doi: 10.4103/1947-2714.136902
16. Ministry of Health Nutrition and Indigenous Medicine. *Annual Health Bulletin Sri Lanka*. Colombo: Ministry of Health, Nutrition and Indigenous Medicine, 2015.
17. Rajapaksa, LC, Arambepola C, Gunawardena N. *Nutritional Status in Sri Lanka, Determinants and Interventions: a Desk Review*. Colombo: UNICEF, 2011.  
[http://files.unicef.org/srilanka/2012\\_SL\\_Nutri\\_Desk\\_review.pdf](http://files.unicef.org/srilanka/2012_SL_Nutri_Desk_review.pdf) [accessed 10 June 2019].
18. Perera PJ, Ranathunga N, Fernando MP, Warnakulasuriya TD, Wickremasinghe RA. Growth parameters at birth of babies born in Gampaha district, Sri Lanka and factors influencing them. *World Health Organization South-East Asia Journal of Public Health* 2013, 2: 57-62.
19. Jayawardena P. Underlying causes of child and maternal nutrition in the estate sector of Sri Lanka. *Journal of South Asian Studies* 2014, 2: 241-55.
20. Anuranga C, Wickramasinghe R, Rannan-Eliya R, Hossain SMM, Abeykoon ATPL. Trends, inequalities and determinants of low birth weight in Sri Lanka. *Ceylon Medical Journal* 2012, 57: 61-9.
21. Department of Census and Statistics. *Population and Housing Census Final Report*. Colombo: Department of Census and Statistics, 2012.  
<http://www.statistics.gov.lk/PopHouSat/CPH2011/Pages/Activities/Reports/FinalReport/FinalReport.pdf> [accessed 05 Sep 2019].
22. World Health Organization. *WHO Multicentre Growth Reference Study Group. WHO Child Growth Standards: Length/Height-for-Age, Weight-for-Age, Weight-for-Length, Weight-for-Height and Body Mass Index-for-Age: Methods and Development*. Geneva: World Health Organization, 2006.
23. Winkvist A, Rasmussen KM, Habich JP. A new definition of maternal depletion syndrome. *American Journal of Public Health* 1992, 82: 691-694  
doi:doi.org/10.2105/AJPH.82.5.691

- 1  
2  
3 24 King JC. The risk of maternal nutritional depletion and poor outcomes increases in  
4 early or closely spaced pregnancies. *Journal of Nutrition* 2013, 133(supplement):  
5 1,732s-17326s.  
6 doi: <https://doi.org/10.1093/jn/133.5.1732S>  
7  
8 25 Shell-Duncan B, Yung S. The maternal depletion transition in northern Kenya: the  
9 effects of settlement, development and disparity. *Social Science and Medicine* 2004, 58:  
10 2,485-98.  
11 doi: <https://doi.org/10.1016/j.socscimed.2003.09.016>  
12  
13 26 O'Donnell O, van Doorslaer E, Wagstaff A, Lindelow M. *Analyzing Health Equity Using*  
14 *Household Survey Data.*: Washington, DC, 2008.  
15  
16 27 Sri Lanka Thriposha Limited. *Nutrient Content*, 2016. Available from:  
17 <http://www.thriposha.lk/thriposha-production/nutrient-content/> [accessed 10 Oct  
18 2019].  
19  
20 28 Rannan-Eliya R. Understanding the Paradox of Undernutrition in Sri Lanka. Paper  
21 presented at the International Conference on Maternal and Child Nutrition, Colombo,  
22 23-24 November 2015.  
23  
24 29 Damayanthi MKN, Champika PAJ. *An Evaluation of Samurdhi Banks in Poverty*  
25 *Alleviation* (Research Report no. 165). Colombo: Hector Kobbekaduwa Agrarian  
26 Research and Training Institute, 2014.  
27 [http://www.harti.gov.lk/images/download/reasearch\\_report/new1/165.pdf](http://www.harti.gov.lk/images/download/reasearch_report/new1/165.pdf) [accessed 10  
28 June 2019].  
29  
30 30 Center for Public Impact. *The Samurdhi Programme in Sri Lanka*, 2019. Available from:  
31 <https://www.centreforpublicimpact.org/case-study/samurdhi-programme-sri-lanka/>  
32 [accessed 23 Oct 2019].  
33  
34 31 Channon AS, Padmadas SS, McDonald J. Measuring birth weight in developing  
35 countries: does the method of reporting in retrospective surveys matter? *Maternal and*  
36 *Child Health Journal* 2011, 15: 12-18.  
37 doi:<https://doi.org/10.1007/s10995-009-0553-3>  
38  
39  
40 32 Blencowe H, Krusevec J, de Onis M, Black RE, An X, Stevens GA, et al. National, regional,  
41 and worldwide estimates of low birthweight in 2015, with trends from 2000: a  
42 systematic analysis. *The Lancet Global Health* 2019, 7: e849-e860.  
43 doi: [https://doi.org/10.1016/S2214-109X\(18\)30565-5](https://doi.org/10.1016/S2214-109X(18)30565-5)  
44  
45  
46  
47  
48  
49  
50  
51  
52  
53  
54  
55  
56  
57  
58  
59  
60

1  
2  
3  
4  
5  
6  
7  
8  
9  
10  
11  
12  
13  
14  
15  
16  
17  
18  
19  
20  
21  
22  
23  
24  
25  
26  
27  
28  
29  
30  
31  
32  
33  
34  
35  
36  
37  
38  
39  
40  
41  
42  
43  
44  
45  
46  
47  
48  
49  
50  
51  
52  
53  
54  
55  
56  
57  
58  
59  
60

**Figure 1**  
**Percentage of babies with low birth weight in Sri Lanka: 1990-2017**

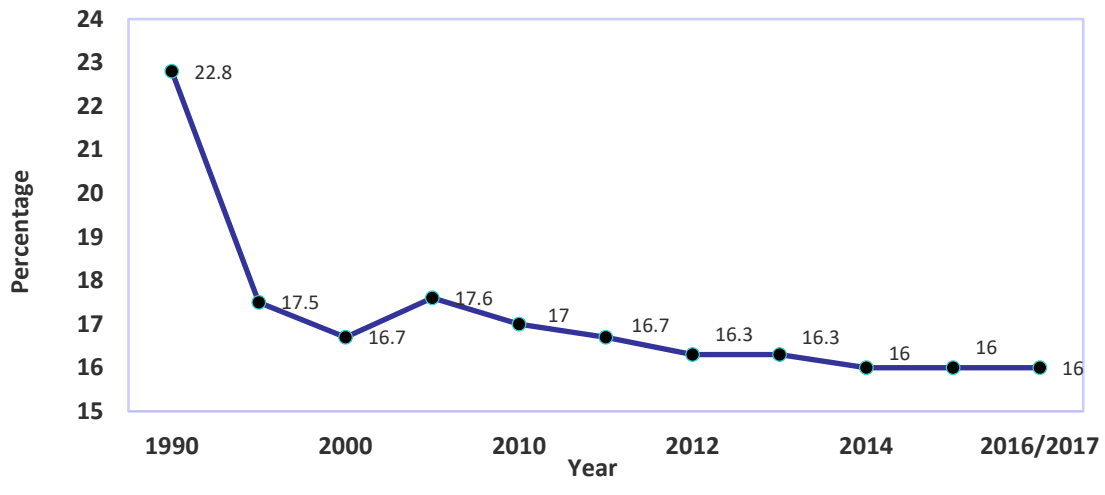

Data source: Department of Census and Statistics<sup>1</sup>

review only

**Figure 2a**  
**Concentration curve showing the cumulative proportion of low birth weight by wealth quintiles**

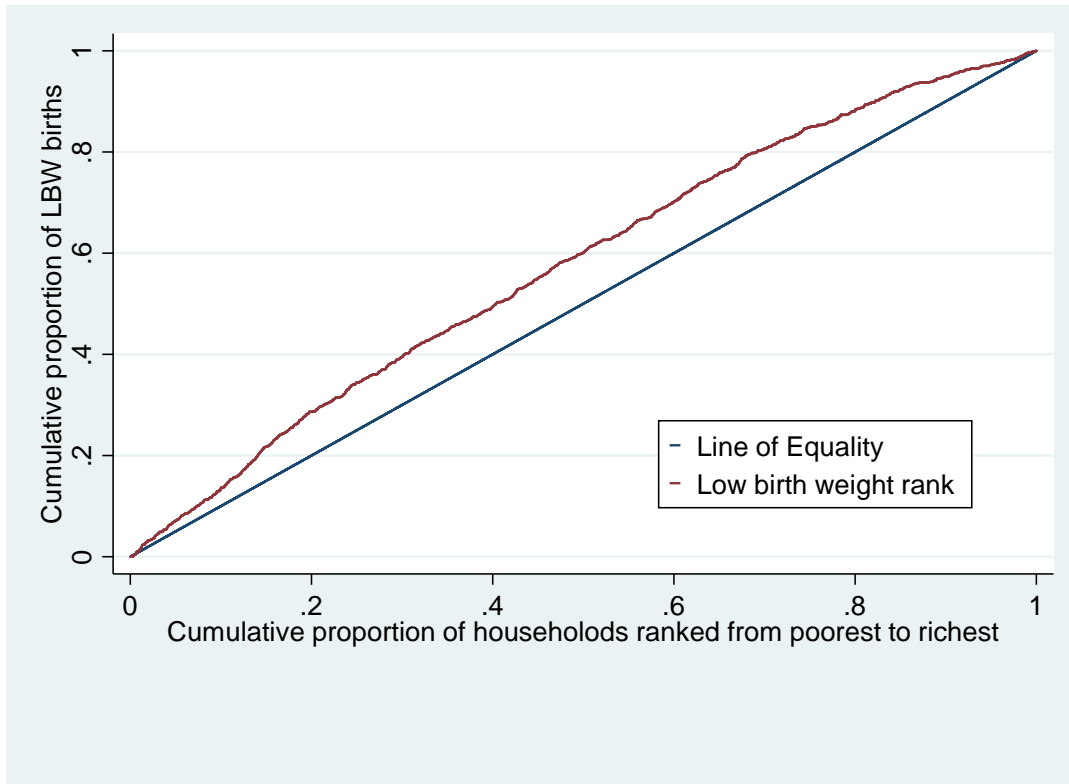

view only

1  
2  
3 **Figure 2b**  
4 **Concentration curves showing the cumulative proportion of low birth weight by**  
5 **residential sector**  
6  
7  
8  
9

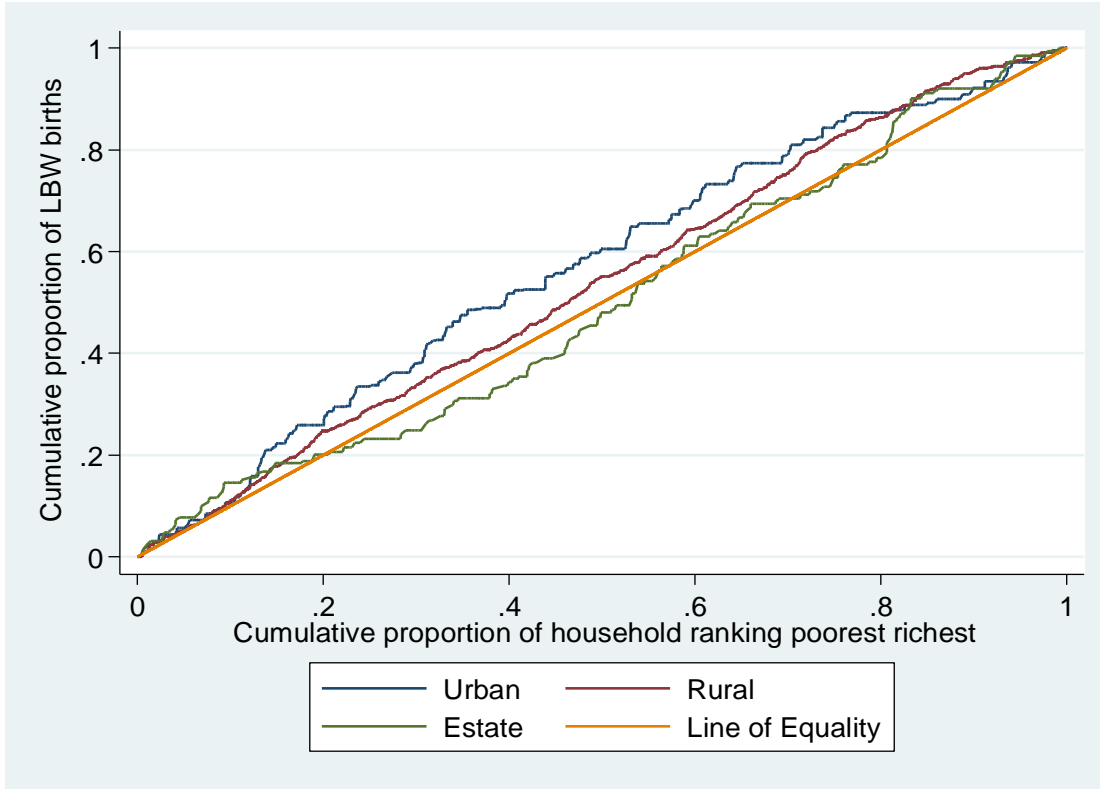

**STROBE 2007 (v4) Statement—Checklist of items that should be included in reports of *cross-sectional studies***

***Title of the study: Social inequalities in low birth weight outcomes in Sri Lanka: evidence from the Demographic and health survey 2016***

| Section/Topic                | Item # | Recommendation                                                                                                                                                                       | Reported on page # |
|------------------------------|--------|--------------------------------------------------------------------------------------------------------------------------------------------------------------------------------------|--------------------|
| Title and abstract           | 1      | (a) Indicate the study's design with a commonly used term in the title or the abstract                                                                                               | 1                  |
|                              |        | (b) Provide in the abstract an informative and balanced summary of what was done and what was found                                                                                  | 1-3                |
| <b>Introduction</b>          |        |                                                                                                                                                                                      |                    |
| Background/rationale         | 2      | Explain the scientific background and rationale for the investigation being reported                                                                                                 | 2-3                |
| Objectives                   | 3      | State specific objectives, including any prespecified hypotheses                                                                                                                     | 3                  |
| <b>Methods</b>               |        |                                                                                                                                                                                      |                    |
| Study design                 | 4      | Present key elements of study design early in the paper                                                                                                                              | 3-5                |
| Setting                      | 5      | Describe the setting, locations, and relevant dates, including periods of recruitment, exposure, follow-up, and data collection                                                      | 3-4                |
| Participants                 | 6      | (a) Give the eligibility criteria, and the sources and methods of selection of participants                                                                                          | 4-5                |
| Variables                    | 7      | Clearly define all outcomes, exposures, predictors, potential confounders, and effect modifiers. Give diagnostic criteria, if applicable                                             | 5                  |
| Data sources/<br>measurement | 8*     | For each variable of interest, give sources of data and details of methods of assessment (measurement). Describe comparability of assessment methods if there is more than one group | 5                  |
| Bias                         | 9      | Describe any efforts to address potential sources of bias                                                                                                                            | 5                  |
| Study size                   | 10     | Explain how the study size was arrived at                                                                                                                                            | 3-4                |
| Quantitative variables       | 11     | Explain how quantitative variables were handled in the analyses. If applicable, describe which groupings were chosen and why                                                         | 4-5                |
| Statistical methods          | 12     | (a) Describe all statistical methods, including those used to control for confounding                                                                                                | 5                  |
|                              |        | (b) Describe any methods used to examine subgroups and interactions                                                                                                                  | 9                  |

|                          |     |                                                                                                                                                                                                              |                |
|--------------------------|-----|--------------------------------------------------------------------------------------------------------------------------------------------------------------------------------------------------------------|----------------|
|                          |     | (c) Explain how missing data were addressed                                                                                                                                                                  | Not applicable |
|                          |     | (d) If applicable, describe analytical methods taking account of sampling strategy                                                                                                                           | 3              |
|                          |     | (e) Describe any sensitivity analyses                                                                                                                                                                        | Not applicable |
| <b>Results</b>           |     |                                                                                                                                                                                                              |                |
| Participants             | 13* | (a) Report numbers of individuals at each stage of study—eg numbers potentially eligible, examined for eligibility, confirmed eligible, included in the study, completing follow-up, and analysed            | 5              |
|                          |     | (b) Give reasons for non-participation at each stage                                                                                                                                                         | Not applicable |
|                          |     | (c) Consider use of a flow diagram                                                                                                                                                                           | Not applicable |
| Descriptive data         | 14* | (a) Give characteristics of study participants (eg demographic, clinical, social) and information on exposures and potential confounders                                                                     | 5-6            |
|                          |     | (b) Indicate number of participants with missing data for each variable of interest                                                                                                                          | Not applicable |
| Outcome data             | 15* | Report numbers of outcome events or summary measures                                                                                                                                                         | 5-8            |
| Main results             | 16  | (a) Give unadjusted estimates and, if applicable, confounder-adjusted estimates and their precision (eg, 95% confidence interval). Make clear which confounders were adjusted for and why they were included | 10-15          |
|                          |     | (b) Report category boundaries when continuous variables were categorized                                                                                                                                    | 9-10           |
|                          |     | (c) If relevant, consider translating estimates of relative risk into absolute risk for a meaningful time period                                                                                             | Not applicable |
| Other analyses           | 17  | Report other analyses done—eg analyses of subgroups and interactions, and sensitivity analyses                                                                                                               | Not applicable |
| <b>Discussion</b>        |     |                                                                                                                                                                                                              |                |
| Key results              | 18  | Summarise key results with reference to study objectives                                                                                                                                                     | 15             |
| Limitations              | 19  | Discuss limitations of the study, taking into account sources of potential bias or imprecision. Discuss both direction and magnitude of any potential bias                                                   | 17             |
| Interpretation           | 20  | Give a cautious overall interpretation of results considering objectives, limitations, multiplicity of analyses, results from similar studies, and other relevant evidence                                   | 15-16          |
| Generalisability         | 21  | Discuss the generalisability (external validity) of the study results                                                                                                                                        | 16             |
| <b>Other information</b> |     |                                                                                                                                                                                                              |                |
| Funding                  | 22  | Give the source of funding and the role of the funders for the present study and, if applicable, for the original study on which the present article is based                                                | 17             |

\*Give information separately for cases and controls in case-control studies and, if applicable, for exposed and unexposed groups in cohort and cross-sectional studies.

For peer review only

1  
2  
3  
4  
5  
6  
7  
8  
9  
10  
11  
12  
13  
14  
15  
16  
17  
18  
19  
20  
21  
22  
23  
24  
25  
26  
27  
28  
29  
30  
31  
32  
33  
34  
35  
36  
37  
38  
39  
40  
41  
42  
43  
44  
45  
46  
47



# BMJ Open

## Social inequalities in low birth weight outcomes in Sri Lanka: evidence from the Demographic and Health Survey 2016

|                                 |                                                                                                                                                                                                                                                                                                                                                                           |
|---------------------------------|---------------------------------------------------------------------------------------------------------------------------------------------------------------------------------------------------------------------------------------------------------------------------------------------------------------------------------------------------------------------------|
| Journal:                        | <i>BMJ Open</i>                                                                                                                                                                                                                                                                                                                                                           |
| Manuscript ID                   | bmjopen-2020-037223.R1                                                                                                                                                                                                                                                                                                                                                    |
| Article Type:                   | Original research                                                                                                                                                                                                                                                                                                                                                         |
| Date Submitted by the Author:   | 19-Mar-2020                                                                                                                                                                                                                                                                                                                                                               |
| Complete List of Authors:       | Abeywickrama, Gayathri; University of Southampton, Social Sciences: Social Statistics & Demography<br>Padmadas, sabu; University of Southampton, Global Health Research Institute<br>Hinde, Andrew; University of Southampton, Southampton Statistical Sciences Research Institute; University of Southampton School of Social Sciences, Social Statistics and Demography |
| <b>Primary Subject Heading</b>: | Public health                                                                                                                                                                                                                                                                                                                                                             |
| Secondary Subject Heading:      | Nutrition and metabolism, Global health, Paediatrics                                                                                                                                                                                                                                                                                                                      |
| Keywords:                       | NUTRITION & DIETETICS, Community child health < PAEDIATRICS, PUBLIC HEALTH, SOCIAL MEDICINE                                                                                                                                                                                                                                                                               |
|                                 |                                                                                                                                                                                                                                                                                                                                                                           |

SCHOLARONE™  
Manuscripts



I, the Submitting Author has the right to grant and does grant on behalf of all authors of the Work (as defined in the below author licence), an exclusive licence and/or a non-exclusive licence for contributions from authors who are: i) UK Crown employees; ii) where BMJ has agreed a CC-BY licence shall apply, and/or iii) in accordance with the terms applicable for US Federal Government officers or employees acting as part of their official duties; on a worldwide, perpetual, irrevocable, royalty-free basis to BMJ Publishing Group Ltd ("BMJ") its licensees and where the relevant Journal is co-owned by BMJ to the co-owners of the Journal, to publish the Work in this journal and any other BMJ products and to exploit all rights, as set out in our [licence](#).

The Submitting Author accepts and understands that any supply made under these terms is made by BMJ to the Submitting Author unless you are acting as an employee on behalf of your employer or a postgraduate student of an affiliated institution which is paying any applicable article publishing charge ("APC") for Open Access articles. Where the Submitting Author wishes to make the Work available on an Open Access basis (and intends to pay the relevant APC), the terms of reuse of such Open Access shall be governed by a Creative Commons licence – details of these licences and which [Creative Commons](#) licence will apply to this Work are set out in our licence referred to above.

Other than as permitted in any relevant BMJ Author's Self Archiving Policies, I confirm this Work has not been accepted for publication elsewhere, is not being considered for publication elsewhere and does not duplicate material already published. I confirm all authors consent to publication of this Work and authorise the granting of this licence.

# Social inequalities in low birth weight outcomes in Sri Lanka: evidence from the Demographic and Health Survey 2016

Gayathri Abeywickrama<sup>1</sup>, Sabu S. Padmadas<sup>2</sup>, Andrew Hinde<sup>1, 3</sup>

<sup>1</sup> *Department of Social Statistics and Demography, School of Economic, Social and Political Sciences, Faculty of Social Sciences, University of Southampton*

<sup>2</sup> *Global Health Research Institute, University of Southampton*

<sup>3</sup> *Southampton Statistical Sciences Research Institute, University of Southampton*

Paper submitted to the British Medical Journal (BMJ –Open), 12 December 2019

Revision submitted on 17 March 2020

## Correspondence

Dr. Andrew Hinde

Department of Social Statistics and Demography  
School of Economic, Social and Political Sciences  
Faculty of Social Sciences, University of Southampton  
Highfield Campus, Southampton SO17 1BJ

United Kingdom

Email: Andrew.Hinde@soton.ac.uk

Tel : + 44 23(0)8059 9631

**Word count** excluding title page, abstract, references, figures and tables: 2,810

## ABSTRACT

**Objective:** To investigate social inequalities underlying low birth weight (LBW) outcomes in Sri Lanka.

**Design:** Cross-sectional study

**Setting:** This study used the Sri Lanka Demographic and Health Survey 2016, the first such survey available since the Civil War ended in 2001.

**Participants:** Birth weight data extracted from the child health development records available for 7,713 babies born between January 2011 and the date of interview in 2016.

**Outcome measures:** The main outcome variable was birth weight, classified as LBW ( $\leq 2,500$ g) and normal.

**Methods:** We applied random intercept three-level logistic regression to examine the association between LBW and maternal, socioeconomic and geographic variables. Concentration indices were estimated for different population sub-groups.

**Results:** The population-level prevalence of LBW was 16.9%, but was significantly higher in the estate sector (28.4%) compared to rural (16.6%) and urban (13.6%) areas. Negative concentration indices suggest a relatively higher concentration of LBW in poor households in rural areas and the estate sector. Results from random intercept models confirmed our hypothesis of significantly higher risk of LBW outcomes across poorer households and Indian Tamil communities (AOR:1.70, 95% CI:[1.02,2.83],  $p < 0.05$ ). There was substantial unobserved variation in LBW outcomes at the mother level. The effect of maternal biological variables was larger than that of socioeconomic factors.

**Conclusion:** LBW rates are significantly higher among babies born in poorer households and Indian Tamil communities. The findings highlight the need for nutrition interventions targeting pregnant women of Indian Tamil ethnicity and those living in economically deprived households.

**Keywords** Low birth weight; social inequalities; maternal factors; Demographic and Health Surveys; Sri Lanka

## STRENGTHS AND LIMITATIONS OF THIS STUDY

- The survey covered the entire island for the first time after the Civil War ended in 2001.
- Birth weight data were obtained from child health records and most of the births are institutional deliveries.
- Birth weight data can be biased due to rounding errors or other errors related to weighing instruments.
- Due to data constraints, data on genetic factors and pre-pregnancy weight that could have affected the LBW were not included in the analysis.

## INTRODUCTION

Over the last few decades, Sri Lanka has experienced a marked reduction in infant, child and maternal mortality rates,<sup>1,2</sup> when compared to other South Asian countries. However, there has been little or no progress in child health indicators in Sri Lanka particularly low birth weight (LBW) outcomes, which have hindered the achievement of health-related United Nations Millennium Development Goals.<sup>3</sup> For example, despite the reduction of LBW rates from 22.8% to 16.7% between 1990 and 2000, the percentage of children born with LBW has remained at around 17% since 2000 (Figure 1).<sup>1-4</sup>

LBW is a critical factor associated with neonatal and infant deaths, and nutritional and health outcomes at later stages of child development.<sup>4-9</sup> LBW babies are more vulnerable to contracting infections, malnutrition and disability during childhood than those born with normal weight, particularly cognitive disorders related to behaviour and learning.<sup>6</sup> LBW babies who survive infancy are also vulnerable to increased risks of non-communicable and chronic diseases in adulthood.<sup>9-10</sup>

Global and regional variations in LBW rates are pronounced, with the highest burden in low-and middle-income countries, which account for more than 95% of all LBW babies. South Asia has the largest share of LBW babies, constituting 48% of all LBW babies globally<sup>4,11</sup> with the highest rates recorded in Bangladesh, India and Pakistan.<sup>12</sup> Maternal bio-behavioural risk factors such as age, nutritional status, poor diet during pregnancy, body mass index (BMI), gestational age, inter-pregnancy interval, parity, and lack of antenatal care as well as social, economic and environmental factors such as poverty and low socioeconomic status are associated with LBW outcomes.<sup>4,11-15</sup>

High rates of LBW remain a critical public health problem in Sri Lanka, with a long-term impact on health outcomes, disease burden and economic productivity.<sup>16</sup> National health programmes promoting universal access to antenatal care, the multi-sectoral

1  
2  
3 food and micronutrient supplementation programme aligned to the National Nutrition  
4 Policy (2009–2013), and the National Health Policy in 2011 – alongside poverty  
5 alleviation programmes were pertinent but contributed little to reducing the incidence  
6 of LBW outcomes.<sup>17</sup> Previous small-scale community studies in Sri Lanka have identified  
7 that the risk of LBW babies is particularly high among mothers in the estate sector.<sup>17-20</sup>  
8  
9 The estate sector comprises mostly Indian Tamil tea plantation workers who live in the  
10 centre and south of Sri Lanka.<sup>21</sup>  
11  
12  
13  
14  
15  
16  
17

18 Existing studies on LBW have been focused on homogeneous and relatively small  
19 samples in specific settings, for example rural or hospital-based studies. There is little  
20 population-level research on the extent of inequalities in LBW outcome in Sri Lanka. The  
21 present research addresses this gap by analysing the social inequalities underlying LBW  
22 outcomes and associated risk factors in Sri Lanka, based on recent data from a nationally  
23 representative cross-sectional survey. We hypothesise that children born in poor  
24 households and to the Indian Tamil tea plantation workers in the estate sector are more  
25 vulnerable to LBW outcomes than their counterparts living in richer households in  
26 other rural areas, and in towns and cities.  
27  
28  
29  
30  
31  
32  
33  
34  
35

36 [Figure 1 about here]  
37  
38  
39  
40  
41  
42

## 43 **METHODS**

### 44 **Sample**

45 We used data from the Sri Lanka Demographic and Health Survey (SLDHS) conducted  
46 during 2016-2017. This is the first nationally representative sample survey to be  
47 implemented since the Civil War ended in 2001. The SLDHS used a two-stage stratified  
48 sampling design. A total of 28,800 housing units were selected for the survey. Within  
49 the households 18,302 married women aged 15-49 years were selected for interview.  
50 SLDHS collected detailed data on birth histories and mothers' reproductive health  
51 behaviours, along with socioeconomic and demographic data.  
52  
53  
54  
55  
56  
57  
58  
59  
60

1  
2  
3 The analysis considered 7,072 mothers of reproductive age (15-49 years) who had at least  
4 one birth in the five years preceding the survey: 6,069 had one birth, and 1,003 had two or  
5 more births, of whom 27 had three and 1 had four children. The total number of births to  
6 the 7,072 mothers was 8,104. Of these, 7,964 were singleton (98.3%) and 140 (1.7%) were  
7 multiple births. For 251 singleton births, either the birth weight data were missing or the  
8 reported birth weight was extreme (over 6,500 grams (0.36% of births)).  
9  
10  
11  
12  
13  
14  
15

16 For the remaining 7,713 births, the mean birth weight was 2,917 grams (95% CI: [2,906,  
17 2,927]) and the median was 2,920 grams. For 140 multiple births, the mean birth weight was  
18 2,135 grams (95% CI: [2,050, 2,214]) and the median was 2,175 grams. We excluded multiple  
19 births in the further analysis, since 81% of the multiple births had low birth weight. We found  
20 no statistical difference in the distribution of socioeconomic factors between singleton and  
21 multiple births. For 220 cases (2.6% of the total), birth weight was recorded at exactly  
22 2,500 grams. Our final analysis sample includes 7,713 singleton births with a recorded  
23 birth weight between January 2011 and November 2016 (survey date).  
24  
25  
26  
27  
28  
29  
30  
31  
32

### 33 **Outcome variable**

34 We followed the standard definition of LBW (babies weighing less than 2,500 grams)  
35 but also considered those with a reported birth weight of exactly 2,500 grams,<sup>22</sup> to allow  
36 for potential rounding errors while entering LBW data on child health development  
37 records.  
38  
39  
40  
41  
42  
43

### 44 **Explanatory variables**

45 We grouped the explanatory variables into three categories: maternal depletion;  
46 socioeconomic and geographical. The classification of maternal depletion variables was  
47 on the basis of the theory of maternal depletion syndrome which states that women  
48 with closely-spaced pregnancies are vulnerable to enter the reproductive cycle with  
49 reduced nutrition reserves.<sup>23</sup> Maternal nutrition depletion may lead to negative  
50 outcomes such as low birth weight, infant mortality, and reduced fecundity.<sup>23-25</sup> SLDHS  
51 has limited variables to measure maternal depletion: maternal age, maternal BMI and  
52 height, preceding birth interval, micronutrient (iron and folic acid tablets) intake and  
53  
54  
55  
56  
57  
58  
59  
60



1  
2  
3 food supplementation (*Thripasha*) received during pregnancy. Micronutrient  
4 supplementation and *Thripasha* are recommended by the government and are given  
5 free for pregnant and lactating mothers in Sri Lanka.<sup>17</sup> We also have data on the  
6 frequency of antenatal care visits and the sex of the child. The survey asked mothers to  
7 report their gestational age in months. However, we did not use this information since the  
8 reported gestational data (in months) could be biased and grossly underestimated.  
9  
10  
11  
12  
13  
14  
15

16 In addition, we considered the following socioeconomic variables: maternal education,  
17 a household wealth index as a proxy for measuring socioeconomic status, and ethnicity.  
18 Household wealth index quintile is a standard composite measure of household  
19 ownership of assets, materials and access to basic sanitation. The DHS estimates  
20 household wealth index using principal component analysis separately for urban, rural  
21 and sector areas. Finally, we considered two key geographic variables: (1) place of  
22 residence classified as urban, rural and estate sector (the urban sector is comprised of  
23 areas administered by municipal and urban councils, the estate sector is predominantly  
24 concentrated in the tea plantation areas, while the rural sector comprises the areas not  
25 captured by the urban and estate sectors);<sup>1</sup> and (2) nine administratively defined  
26 provinces.  
27  
28  
29  
30  
31  
32  
33  
34  
35  
36  
37  
38  
39

### 40 **Statistical analysis**

41 We examined the binary association between birth weight and selected characteristics.  
42 The outcome variable is coded 0 (reference) for babies with a normal weight and 1 for  
43 those weighing 2,500 grams or less. Then we fit a series of binary logistic regression  
44 models. Model 1 includes maternal depletion variables, Model 2 includes maternal  
45 depletion and socioeconomic variables, and Model 3 includes maternal depletion,  
46 socioeconomic variables and geographical variables. The variance inflation factor is  
47 used to check for collinearity and to ensure that the assumptions of multicollinearity are  
48 not violated. Due to the hierarchical nature of the data with some mothers having more  
49 than one child (903 mothers), and these mothers being grouped within communities  
50 (primary sampling units or clusters), we examine the variation in LBW at three levels:  
51  
52  
53  
54  
55  
56  
57  
58  
59  
60

1  
2  
3 child, mother and community, using the same series of models, but taking account of  
4 the fact that some mothers have more than one child, and mothers are clustered within  
5 communities.  
6  
7  
8  
9

10  
11 Additionally, we estimated concentration indices to measure the extent of wealth  
12 inequalities underlying LBW, which are illustrated graphically using concentration  
13 curves.  
14  
15  
16

### 17 18 **Patient and public involvement**

19  
20 Not applicable for this study  
21  
22  
23

## 24 25 **RESULTS**

### 26 27 **Descriptive analysis**

28  
29 Table 1 shows the statistical association between birth weight and selected variables.  
30 About 17% of babies were born with a LBW and the rate was significantly higher among  
31 babies born in the estate sector (28.4%) when compared to rural (16.6%) and urban  
32 (13.6) areas. LBW was concentrated among teenage and young mothers aged under 20  
33 and 20-24 years. There is a positive association between maternal anthropometric  
34 measures (BMI and height) and LBW. The association between LBW and the number of  
35 antenatal visits is marginal (Table 1). There was no significant association between LBW  
36 and receipt of *Thripasha* during pregnancy. However, LBW was relatively common  
37 among mothers who had not had iron and folic acid supplements. Female babies were  
38 more likely than male babies to be born with LBW. Among the socioeconomic  
39 characteristics, the prevalence of LBW was inversely related to educational attainment  
40 and household wealth. For example, 21.4% of mothers in the lowest wealth quintile had  
41 low birth weight babies, compared with only around half that proportion among the  
42 highest wealth quintile. Indian Tamils were more likely than the other ethnic groups to  
43 have LBW babies, and mothers living in the estate sector generally have a higher  
44 proportion of LBW babies (28.4%) compared with their counterparts living in rural and  
45  
46  
47  
48  
49  
50  
51  
52  
53  
54  
55  
56  
57  
58  
59  
60

urban areas. LBW was common in Central and Sabaragamuwa regions and less common in the Northern region (Table 1).

**Table 1**

**Percentage distribution of recorded birth weight by maternal depletion, socioeconomic and geographical factors: Sri Lanka, 2016**

| Variable and category                        | Birth weight (in grams) |           |             |             | Number of births | P-value |
|----------------------------------------------|-------------------------|-----------|-------------|-------------|------------------|---------|
|                                              | <=2500                  | 2501-3000 | 3001-3500   | 3501-6500   |                  |         |
| <b>All data</b>                              | <b>16.9</b>             | <b>38</b> | <b>34.9</b> | <b>10.2</b> | <b>7,713</b>     |         |
| <b>Maternal age (years)</b>                  |                         |           |             |             |                  |         |
| Under 20                                     | 25.6                    | 39.1      | 31          | 4           | 74               | 0.001   |
| 20-24                                        | 19.7                    | 41.9      | 31.2        | 7.1         | 1,012            |         |
| 25-34                                        | 16.1                    | 37.8      | 35.9        | 10          | 4,468            |         |
| 35-39                                        | 16.2                    | 36.1      | 34.2        | 13.2        | 1,622            |         |
| 40 and over                                  | 18.4                    | 36.5      | 35.3        | 9.6         | 537              |         |
| <b>Maternal body mass index</b>              |                         |           |             |             |                  |         |
| Under 18.5                                   | 26.4                    | 45.5      | 24.4        | 3.5         | 847              | 0.000   |
| 18.5-24.9                                    | 17.2                    | 39.9      | 33.9        | 8.8         | 3,726            |         |
| 25.0-29.9                                    | 14.1                    | 33.9      | 38.4        | 13.5        | 2,171            |         |
| 30.0 or more                                 | 11.8                    | 31.9      | 40.1        | 15.9        | 801              |         |
| <b>Maternal height</b>                       |                         |           |             |             |                  |         |
| Short (up to 145.0 cm)                       | 28.8                    | 41.2      | 24.5        | 5.3         | 545              | 0.000   |
| Average (145.1-155.0 cm)                     | 18.5                    | 39.6      | 32.9        | 8.7         | 4,198            |         |
| Tall (155.1 cm and over)                     | 12                      | 34.8      | 39.5        | 13.5        | 2,821            |         |
| <b>Preceding birth interval</b>              |                         |           |             |             |                  |         |
| First birth                                  | 19.5                    | 40.6      | 32          | 7.7         | 3,011            | 0.000   |
| Under 24 months                              | 14.9                    | 34.5      | 36.5        | 13.9        | 394              |         |
| 24-47 months                                 | 12.7                    | 35.5      | 39.1        | 12.5        | 1,594            |         |
| 48-59 months                                 | 15.2                    | 35.3      | 36.4        | 12.9        | 793              |         |
| 60 months or more                            | 17.3                    | 37.5      | 34.8        | 10.3        | 1,931            |         |
| <b>Received <i>Thripasha</i></b>             |                         |           |             |             |                  |         |
| Received and consumed                        | 18.5                    | 43.8      | 30.5        | 7.3         | 504              | 0.108   |
| Received and shared                          | 17                      | 37.5      | 34.8        | 10.5        | 5,921            |         |
| Not received                                 | 9.7                     | 40.7      | 37.8        | 11.6        | 103              |         |
| <b>Taken iron and folic acid supplements</b> |                         |           |             |             |                  |         |
| Received and consumed                        | 16.5                    | 38.1      | 35          | 10.3        | 6,503            | 0.000   |
| Not received and consumed                    | 25.7                    | 36        | 26.6        | 11.5        | 1,210            |         |
| <b>Antenatal visits</b>                      |                         |           |             |             |                  |         |
| Fewer than 3 times                           | 16.9                    | 38.2      | 35.7        | 9           | 1,378            | 0.041   |
| 3-5 times                                    | 24                      | 37.1      | 30.6        | 8.1         | 737              |         |
| 6-10 times                                   | 16.1                    | 38.1      | 35          | 10.6        | 5,314            |         |
| 11 or more times                             | 12.3                    | 36.2      | 38.3        | 13          | 284              |         |
| <b>Sex of child</b>                          |                         |           |             |             |                  |         |
| Male                                         | 15.1                    | 37.4      | 36.3        | 11.3        | 4,000            | 0.000   |
| Female                                       | 18.7                    | 38.8      | 33.5        | 9           | 3,794            |         |

**Table 1 (contd.)**

**Percentage distribution of recorded birth weight by maternal depletion, socioeconomic and geographical factors: Sri Lanka, 2016**

| Variable and category     | Birth weight (in grams) |           |           |           | Number of births | P-value |
|---------------------------|-------------------------|-----------|-----------|-----------|------------------|---------|
|                           | <=2500                  | 2501-3000 | 3001-3500 | 3501-6500 |                  |         |
| <b>Education level</b>    |                         |           |           |           |                  |         |
| No education and primary  | 27.6                    | 40.2      | 24.7      | 7.3       | 380              | 0.000   |
| Secondary and passed GCE  |                         |           |           |           |                  |         |
| O-level                   | 18.0                    | 38.4      | 33.7      | 9.7       | 5,127            |         |
| Passed GCE A-level        | 11.6                    | 39.0      | 38.0      | 11.2      | 1,761            |         |
| Degree and above          | 15.0                    | 26.2      | 44.7      | 13.9      | 445              |         |
| <b>Wealth index</b>       |                         |           |           |           |                  |         |
| Poorest                   | 21.4                    | 40.6      | 29.8      | 8.0       | 1,900            | 0.000   |
| Poor                      | 17.8                    | 38.0      | 35.3      | 8.7       | 1,571            |         |
| Middle                    | 17.9                    | 38.5      | 33.2      | 10.2      | 1,460            |         |
| Rich                      | 14.1                    | 36.5      | 37.8      | 11.4      | 1,514            |         |
| Richest                   | 10.8                    | 34.9      | 40.3      | 13.8      | 1,268            |         |
| <b>Ethnicity</b>          |                         |           |           |           |                  |         |
| Sinhala                   | 17.2                    | 38.0      | 34.5      | 10.0      | 5,025            | 0.000   |
| Sri Lanka Tamil           | 15.9                    | 36.4      | 36.8      | 10.8      | 1,564            |         |
| Indian Tamil              | 32.6                    | 42.5      | 23.5      | 1.2       | 242              |         |
| Muslim                    | 12.1                    | 38.6      | 36.7      | 12.4      | 857              |         |
| Burgher and Malay         | 12.0                    | 48.0      | 28.0      | 12.0      | 25               |         |
| <b>Residential sector</b> |                         |           |           |           |                  |         |
| Urban                     | 13.6                    | 34.4      | 38.5      | 13.2      | 1,249            | 0.000   |
| Rural                     | 16.6                    | 38.1      | 35.2      | 10.0      | 5,972            |         |
| Estate                    | 28.4                    | 45.1      | 21.9      | 4.4       | 492              |         |
| <b>Province</b>           |                         |           |           |           |                  |         |
| Western                   | 14.5                    | 37.8      | 36.5      | 11.1      | 1,455            | 0.000   |
| Central                   | 20.2                    | 38.8      | 32.7      | 8.3       | 996              |         |
| Southern                  | 16.4                    | 38.1      | 34.3      | 11.0      | 923              |         |
| Northern                  | 12.0                    | 34.4      | 40.3      | 13.1      | 905              |         |
| Eastern                   | 17.0                    | 37.5      | 35.0      | 10.3      | 857              |         |
| North-Western             | 17.1                    | 34.9      | 35.7      | 12.1      | 832              |         |
| North Central             | 14.3                    | 42.4      | 33.2      | 10.0      | 530              |         |
| Uva                       | 18.7                    | 41.0      | 35.1      | 4.9       | 543              |         |
| Sabaragamuwa              | 24.1                    | 39.7      | 27.9      | 8.1       | 672              |         |

\*P < 0.05 \*\*P<0.01\*\*\* P<0.001

Data source: Sri Lanka Demographic and Health Survey 2016.

1  
2  
3 The socioeconomic differentials are further illustrated in the concentration curves  
4 (Figures 2a and 2b). A concentration index ranges in value between -1 and +1. Negative  
5 values indicate that the variable is concentrated in poor households, a value of zero  
6 indicates there is no inequality, and positive values indicate that the variable is  
7 concentrated in the richest households. The concentration curve is a graphical  
8 exploration of the concentration index. If the concentration curve lies on the diagonal  
9 45° line, it shows perfect equality; when it lies below the line, the outcome is more  
10 concentrated among the higher SES (socioeconomic status) individuals of the  
11 population; if it lies above the 45 degree line, the outcome is more concentrated among  
12 the poor SES individuals in the population.<sup>26</sup>

13  
14  
15  
16  
17  
18  
19  
20  
21  
22  
23  
24 The results for LBW show a concentration index of -0.13 (95% CI: -0.15, -0.10),  
25 suggesting that LBW is concentrated among the poorer households (Figure 2a). The  
26 curve shows that, for example, the poorest 20% of households have about 30% of LBW  
27 babies whereas the richest 20% of households have only about 10% of LBW babies. We  
28 graphed concentration curves by residential sector (Figure 2b). The concentration curves  
29 for all sectors lie above the equality line, which suggests that LBW outcomes were higher  
30 among children in poorer households. The results show that that inequality within each  
31 sector is less than overall inequality and that, in particular, there is equality of LBW  
32 outcomes within the estate sector. This may be because the estate sector consists very  
33 largely of poor households.

34  
35  
36  
37  
38  
39  
40  
41  
42  
43  
44  
45 [Figures 2a and 2b about here]

### 46 47 48 49 **Regression analysis**

50  
51 Table 2 shows the results of fixed effects logistic regression models with LBW as the  
52 outcome. In Model 1 we included only maternal depletion variables. Mothers with a low  
53 BMI were more likely to have a low birth weight baby than those with normal BMI levels  
54 (adjusted odds ratio AOR: 1.76, 95%CI:[1.41–2.20]). There is a strong inverse association  
55 between maternal height and LBW outcome. Mothers who did not consume iron or folic  
56  
57  
58  
59  
60

1  
2  
3 acid (AOR=1.48, 95%CI:[1.02-2.14]) and those with a female birth (AOR = 1.39, 95%CI:  
4 [1.19-1.63]) were more likely to have a LBW baby than those who did not consume iron  
5 or folic acid or who has a male baby, respectively. Babies born 24-47 months after their  
6 immediately elder sibling were at lower risk of having LBW compared with the first-born  
7 child (AOR=0.58, 95%CI:[0.46-0.73])  
8  
9  
10  
11  
12  
13

14  
15 Model 2 added socioeconomic variables. Although the odds ratios for the maternal  
16 depletion variables in Models 1 and 2 cannot properly be compared because it is  
17 problematic to compare odds ratios across models with different independent variables  
18 in the sample as it reflects the degree of unobserved heterogeneity in the model, there  
19 was little or no change in the effect of the maternal depletion variables (Table 2).  
20 Household wealth was a strong predictor of LBW outcome: babies born in the highest  
21 household wealth quintile had half the odds of LBW compared with those in the lowest  
22 quintile (AOR: 0.50, 95%CI:[0.36–0.69]). Maternal education level was less important,  
23 although mothers with higher levels of education tended to have reduced odds of a  
24 LBW baby. There were some differences by ethnicity: Burgher and Malay mothers were  
25 less likely to have LBW babies, whereas the Indian Tamils were more likely to have LBW  
26 outcomes compared to Sinhala mothers (AOR=1.48, 95%CI:[1.03-2.13]).  
27  
28  
29  
30  
31  
32  
33  
34  
35  
36  
37  
38  
39  
40  
41  
42  
43  
44  
45  
46  
47  
48  
49  
50  
51  
52  
53  
54  
55  
56  
57  
58  
59  
60

(Table 2 about here)

**Table 2**  
**Results of the fixed effects multiple logistic regression**

| Variable and category                        | Model 1                      | Model 2                      | Model 3                      |
|----------------------------------------------|------------------------------|------------------------------|------------------------------|
|                                              | Adjusted odds ratio (95% CI) | Adjusted odds ratio (95% CI) | Adjusted odds ratio (95% CI) |
| <b>Maternal body mass index</b>              |                              |                              |                              |
| Under 18.5                                   | 1.76 (1.41-2.20)***          | 1.62 (1.29-2.03)***          | 1.63 (1.31-2.03)***          |
| 18.5-24.9                                    | Ref                          | Ref                          | Ref                          |
| 25.0-29.9                                    | 0.78 (0.65-0.95)*            | 0.83 (0.69-1.00)             | 0.85 (0.71-1.03)             |
| 30.0 or more                                 | 0.73 (0.55-0.96)*            | 0.80 (0.60-1.06)             | 0.74 (0.56-0.98)*            |
| <b>Maternal height</b>                       |                              |                              |                              |
| Short (up to 145.0 cm)                       | 1.91 (1.47-2.74)***          | 1.76 (1.36-2.29)***          | 1.74 (1.35-2.24)***          |
| Average (145.1-155.0 cm)                     | Ref                          | Ref                          | Ref                          |
| Tall (155.1 cm and over)                     | 0.55 (0.46-0.66)***          | 0.58 (0.49-0.70)             | 0.58 (0.49-0.69)***          |
| <b>Preceding birth interval</b>              |                              |                              |                              |
| First birth                                  | Ref                          | Ref                          | Ref                          |
| Under 24 months                              | 0.68 (0.47-0.98)*            | 0.67 (0.46-0.96)*            | 0.73 (0.52-1.04)             |
| 24-47 months                                 | 0.58 (0.46-0.73)***          | 0.56 (0.44-0.70)***          | 0.59 (0.48-0.73)***          |
| 48-59 months                                 | 0.77 (0.59-1.08)             | 0.73 (0.56-0.96)*            | 0.77 (0.59-0.99)*            |
| 60 months or more                            | 0.92 (0.76-1.18)             | 0.85 (0.70-1.04)             | 0.87 (0.72-1.05)             |
| <b>Antenatal care visits</b>                 |                              |                              |                              |
| Fewer than 3 times                           | 1.30 (0.79-2.15)             | 1.43 (0.86-2.37)             | 1.25 (0.81-1.93)             |
| 3-5 times                                    | 1.73 (1.09-2.73)*            | 1.78 (1.11-2.85)*            | 1.75 (1.09-2.81)*            |
| 6-10 times                                   | 1.13 (0.75-1.70)             | 1.14 (0.75-1.72)             | 1.15 (0.76-1.74)             |
| 11 or more times                             | 1.00                         | 1.00                         | 1.00                         |
| <b>Taken iron and folic acid supplements</b> |                              |                              |                              |
| Received and consumed                        | Ref                          | Ref                          |                              |
| Not received and consumed                    | 1.48 (1.02-2.14)*            | 1.43 (0.98-2.08)             |                              |
| <b>Antenatal care visits</b>                 |                              |                              |                              |
| Fewer than 3 times                           | 1.30 (0.79-2.15)             | 1.43 (0.86-2.37)             | 1.25 (0.81-1.93)             |
| 3-5 times                                    | 1.73 (1.09-2.73)*            | 1.78 (1.11-2.85)*            | 1.75 (1.09-2.81)*            |
| 6-10 times                                   | 1.13 (0.75-1.70)             | 1.14 (0.75-1.72)             | 1.15 (0.76-1.74)             |
| 11 or more times                             | 1.00                         | 1.00                         | 1.00                         |
| <b>Sex of child</b>                          |                              |                              |                              |
| Male                                         | Ref                          | Ref                          | Ref                          |
| Female                                       | 1.39 (1.19-1.63)***          | 1.40 (1.20-1.64)***          | 1.45(0.16-1.67)***           |
| <b>Education level</b>                       |                              |                              |                              |
| No education and primary                     |                              | Ref                          | Ref                          |
| Secondary and passed GCE O-level             |                              | 0.75 (0.55-1.03)             | 0.80 (0.58-1.10)             |
| Passed GCE A-level                           |                              | 0.58 (0.40-0.84)**           | 0.63 (0.44-0.90)*            |
| Degree and above                             |                              | 0.90 (0.57-1.44)             | 0.92 (0.58-1.46)             |

**Table 2 (contd.)****Results of the fixed effects multiple logistic regression**

| Variable and category | Model 1                      | Model 2                      | Model 3                      |
|-----------------------|------------------------------|------------------------------|------------------------------|
|                       | Adjusted odds ratio (95% CI) | Adjusted odds ratio (95% CI) | Adjusted odds ratio (95% CI) |
| <b>Wealth index</b>   |                              |                              |                              |
| Poorest               |                              | Ref                          | Ref                          |
| Poor                  |                              | 0.82 (0.65-1.04)             | 0.82 (0.65-1.03)             |
| Middle                |                              | 0.81 (0.64-1.02)             | 0.84 (0.66-1.07)             |
| Rich                  |                              | 0.73 (0.56-0.94)*            | 0.74 (0.58-0.96)*            |
| Richest               |                              | 0.50 (0.36-0.69)***          | 0.54 (0.40-0.73)***          |
| <b>Ethnicity</b>      |                              |                              |                              |
| Sinhala               |                              | Ref                          | Ref                          |
| Sri Lankan Tamil      |                              | 0.85 (0.68-1.05)             | 1.03 (0.74-1.43)             |
| Indian Tamil          |                              | 1.48 (1.03-2.13)*            | 1.70 (1.02-2.83)*            |
| Muslims               |                              | 0.82 (0.61-1.11)             | 0.86 (0.63-1.18)             |
| Burgher and Malay     |                              | 0.54 (0.16-1.77)             | 0.43 (0.13-1.45)             |
| <b>Sector</b>         |                              |                              |                              |
| Urban                 |                              |                              | Ref                          |
| Rural                 |                              |                              | 0.97 (0.77-1.23)             |
| Estate                |                              |                              | 1.06 (0.66-1.68)             |
| <b>Province</b>       |                              |                              |                              |
| Western               |                              |                              | Ref                          |
| Central               |                              |                              | 0.99 (0.74-1.32)             |
| Southern              |                              |                              | 1.05 (0.78-1.41)             |
| Northern              |                              |                              | 0.60 (0.38-0.94)*            |
| Eastern               |                              |                              | 1.06 (0.76-1.47)             |
| North-Western         |                              |                              | 1.16 (0.89-1.51)             |
| North Central         |                              |                              | 0.93 (0.64-1.24)             |
| Uva                   |                              |                              | 0.89 (0.63-1.24)             |
| Sabaragamuwa          |                              |                              | 1.42 (1.07-1.87)*            |

\*\*\* $P < 0.001$ ; \*\* $p < 0.01$ ; \* $p < 0.05$ ; Ref: reference category

The final model included the geographical variables residential sector and province in addition to maternal and socioeconomic factors (Table 2). We removed the iron and folic acid variable from the model, as it was no longer significant in Model 2 (though we note that mothers who had not received and consumed iron and folic acid had a higher risk of LBW babies than mothers who had received and consumed both these supplements). Both maternal and socioeconomic factors remain important predictors of LBW, however, residential sector was less important. The effect of Indian Tamil ethnicity



1  
2  
3 remained significant with a higher odds (AOR: 1.70, 95%CI:[1.02–2.83]). Similarly,  
4 mothers who lived in Sabaragamuwa province had higher odds of LBW than those from  
5 the Western province (AOR: 1.42, 95%CI:[1.07–1.87]). LBW babies were more common  
6 among Indian Tamils than among other ethnic groups. The Indian Tamils lived and  
7 worked mostly at tea plantation estates in Sabaragamuwa province.  
8  
9  
10  
11  
12  
13

### 14 **Random effects**

15  
16 Our data are hierarchical, in that some quantities are specific to children, whereas others  
17 are defined and measured at the mother level and yet others, such as provinces are  
18 defined at a broader community level. It might be that characteristics of mothers and/or  
19 communities lead to the risk of low birth weight among children born to the same  
20 mother, or born within the same community, being correlated. Some of these  
21 characteristics can be observed (for example mother's BMI) but others (for example  
22 genetic factors) cannot be observed. To assess the magnitude of these correlation  
23 effects we estimated a model of low birth weight with no covariates, but three variance  
24 parameters at the child level, the mother level and the community level. We found very  
25 little correlation between the risk of low birth weight for babies within the same  
26 community, but substantial correlation between the risk of low birth weight for children  
27 of the same mother. More than 60% of the variance in LBW is the result of variation  
28 between mothers. This suggests that any community-level effects were those deriving  
29 from the characteristics of mothers living in the same community.  
30  
31  
32  
33  
34  
35  
36  
37  
38  
39  
40  
41  
42  
43  
44

45 To take account of this mother-level variation we re-estimated Model 3 described  
46 above adding a random effect at the mother level. The results are shown in Table 3.  
47 The effect of the covariates is similar to that in the comparable fixed effects model,  
48 though in some cases (for example maternal height) their impact is amplified  
49  
50  
51  
52  
53  
54

55 (Table 3 about here)  
56  
57  
58  
59  
60

**Table 3**  
**Results of the two-level random intercept logistic regression model**

| Variable and category                  | Adjusted odds ratio (95% CI) |
|----------------------------------------|------------------------------|
| <b>Maternal body mass index</b>        |                              |
| Under 18.5                             | 2.14 (1.48-3.09)***          |
| 18.5-24.9                              | Ref                          |
| 25.0-29.9                              | 0.71 (0.54-0.94)*            |
| 30.0 or more                           | 0.60 (0.39-0.91)*            |
| <b>Maternal height</b>                 |                              |
| Short (up to 145.0 cm)                 | 2.48 (1.60-3.83)***          |
| Average (145.1-155.0 cm)               | Ref                          |
| Tall (155.1 cm and over)               | 0.44 (0.32-0.57)***          |
| <b>Number of antenatal care visits</b> |                              |
| Fewer than 3 times                     | 1.65 (0.84-3.24)             |
| 3-5 times                              | 2.79 (1.35-5.30)**           |
| 6-10 times                             | 1.41 (0.75-2.64)             |
| 11 times or more                       | Ref                          |
| <b>Sex of child</b>                    |                              |
| Male                                   | Ref                          |
| Female                                 | 1.55 (1.24-1.95)***          |
| <b>Preceding birth interval</b>        |                              |
| First birth                            | Ref                          |
| Under 24 months                        | 0.55 (0.32-0.92)*            |
| 24-47 months                           | 0.46 (0.33-0.63)***          |
| 48-59 months                           | 0.61 (0.40-0.90)*            |
| 60 months or more                      | 0.74 (0.55-0.98)*            |
| <b>Educational category</b>            |                              |
| No education and primary               | Ref                          |
| Secondary and passed GCE O-level       | 0.59 (0.36-0.98)*            |
| Passed GCE A-level                     | 0.38 (0.21-0.70)**           |
| Degree and above                       | 0.76 (0.36-1.59)             |
| <b>Wealth index quintile</b>           |                              |
| Lowest                                 | Ref                          |
| Second                                 | 0.77 (0.54-1.08)             |
| Middle                                 | 0.81 (0.55-1.17)             |
| Fourth                                 | 0.63 (0.41-0.93)*            |
| Highest                                | 0.43 (0.25-0.70)**           |
| <b>Ethnicity</b>                       |                              |
| Sinhala                                | Ref                          |
| Sri Lankan Tamil                       | 0.91 (0.60-1.38)             |
| Indian Tamil                           | 2.13 (1.12-4.06)*            |
| Muslims                                | 0.71 (0.46-1.08)             |
| Burgher and Malay                      | 0.72 (0.08-5.90)             |

**Table 3 (contd.)**  
**Results of the two-level random intercept logistic regression model**

| Variable and category                  | Adjusted odds ratio (95% CI) |
|----------------------------------------|------------------------------|
| <b>Province</b>                        |                              |
| Western                                | Ref                          |
| Central                                | 1.25 (0.81-1.91)             |
| Southern                               | 1.02 (0.66-1.58)             |
| Northern                               | 0.66 (0.37-1.17)             |
| Eastern                                | 1.27 (0.78-2.06)             |
| North-Western                          | 1.36 (0.88-2.11)             |
| North Central                          | 0.90 (0.53-1.52)             |
| Uva                                    | 0.96 (0.55-1.63)             |
| Sabaragamuwa                           | 1.82 (1.14-2.89)*            |
| Mother-level variance (standard error) | 2.40 (0.324)***              |
| Intra-cluster correlation coefficient  | 0.63                         |
| Log likelihood                         | -2,831.6426                  |
| Akaike information criterion (AIC)     | 5,735.285                    |
| Bayes information criterion (BIC)      | 5,983.016                    |

\*\*\* $P < 0.001$ ; \*\* $p < 0.01$ ; \* $p < 0.05$ ; Ref: reference category

## DISCUSSION

Our findings confirm the research hypothesis of a clear socioeconomic gradient in the risk of LBW in Sri Lanka. Mothers from poor households, especially those from Indian Tamil communities living in the estate sector, have increased risk of LBW babies. The persistence of low birth weight among this group might be attributed to genetic factors deriving from the selected group of marginalised communities of Indian Tamils who were originally brought to Sri Lanka to work in the tea plantations in the nineteenth century.<sup>20</sup> There is a lack of research on genetic causes of LBW in Sri Lanka, and a more thorough investigation of the genetic factors associated with LBW is needed.

The foregoing analyses of SLDHS data confirms the prominent role of maternal factors in determining LBW outcomes. Maternal depletion factors such as maternal BMI and height, and preceding birth interval were more influential in determining LBW than socioeconomic and geographical factors. Multilevel analysis revealed that more than

1  
2  
3 60% of the variation in LBW occurred at the maternal level. Once this had been  
4 accounted for, there was very little additional variation (6% of the total) at the  
5 community level. Birth weights of children born to the same mother were highly  
6 correlated, partly reflecting the impact of unmeasured factors such as genetic and  
7 environmental factors that were not taken into account in the fixed effect model.  
8  
9  
10  
11  
12  
13

14  
15 Our findings highlight the need for nutrition interventions targeting pregnant women  
16 from the Indian Tamil ethnicity and those living in economically deprived households.  
17 The government in Sri Lanka has taken several measures to improve the nutritional  
18 status of pregnant mothers, particularly the free distribution of *Thripasha* targeted at  
19 poor families. However, the effect of receiving and consuming *Thripasha* was not  
20 significant, consistent with findings from previous research.<sup>20</sup> This might be due to the  
21 fact that *Thripasha* fulfils only 400 kcal of energy needs,<sup>27</sup> which is not adequate for  
22 undernourished mothers<sup>28</sup> or our inability to identify true recipients of it. The present  
23 study suggests revisiting the effectiveness of *Thripasha* programme in addressing the  
24 nutritional needs of mothers. The other existing poverty alleviation programme in Sri  
25 Lanka is *Samurdhi* (prosperity), launched in 1994. This also only provides a modest  
26 quantity of monetary support (only 500-1,000 rupees)(around 2.75-5.5 US\$), and does  
27 not always target the right beneficiaries.<sup>29-30</sup>  
28  
29  
30  
31  
32  
33  
34  
35  
36  
37  
38  
39  
40

41 This study showed that increasing the frequency of antenatal care visits tends to reduce  
42 the risk of LBW outcome. Antenatal clinics provide comprehensive health promotion  
43 and pregnancy care services for mothers, such as dietary advice including micronutrient  
44 and *Thripasha* supplementation, methods of newborn care, monitoring of the foetus,  
45 examination of maternal biomarkers and haemoglobin.<sup>15-17</sup> Therefore, it is vital to  
46 expand the services and coverage targeting vulnerable women settled in the estate  
47 sector.  
48  
49  
50  
51  
52  
53  
54  
55  
56

57 LBW is concentrated among poor people, especially within the estate sector. Hence, to  
58 be more effective in reducing the prevalence of LBW, the *Samurdhi* programme should  
59  
60

1  
2  
3 be expanded to target the poorest mothers in the estate sector. Since the maternal level  
4 is more influential in determining LBW in the context of Sri Lanka, policies should be  
5 more centred on improving maternal factors including nutritional level.  
6  
7  
8  
9

## 10 11 12 **STRENGTHS AND LIMITATIONS OF THIS STUDY**

13  
14  
15 The present research is based on cross-sectional data at the national level, which has  
16 been collected for the first time after the war and civil conflict in Sri Lanka. The analysis  
17 is based on data from health records, which are fairly accurate in Sri Lanka where  
18 institutional birth is universal. However, previous studies show that birth weight data  
19 may be biased due to rounding errors or other errors related to weighing instruments  
20 even in hospital settings.<sup>31-32</sup> SLDHS has several limitations. There are no data on genetic  
21 factors as well as on nutrition/dietary intake before, during and after pregnancy.  
22 However, maternal anthropometric data offer useful proxies to assess the relationship  
23 between maternal nutritional status and LBW outcomes. SLDHS has also no data on  
24 gestational weight gain and pre-pregnancy weight: the present study used height and  
25 weight data measures at the time of the survey to calculate BMI values. On the other  
26 hand, maternal weight before and after pregnancy may differ considerably. Therefore,  
27 it is recommended that future studies consider both anthropometric measures and pre-  
28 gestational BMI to examine if there is a relationship with birth weight.  
29  
30  
31  
32  
33  
34  
35  
36  
37  
38  
39  
40  
41  
42  
43  
44  
45

## 46 **CONCLUSION**

47 Our study concludes that lower socioeconomic status mothers, particularly Indian Tamil  
48 mothers have higher LBW, and it differs substantially from other groups. Maternal  
49 factors such as maternal BMI and height, and preceding birth interval along with  
50 antenatal care visits have more influence in determining LBW outcome. Socioeconomic  
51 and geographic factors such as maternal education, wealth and residential sector are  
52 also important determinants of LBW outcomes in Sri Lanka. Public health nutrition  
53 policies and programme interventions should address these key factors to reduce the  
54  
55  
56  
57  
58  
59  
60

1  
2  
3 overall burden of LBW, with a focus on the marginalised Indian Tamil mothers and those  
4  
5 with lower socioeconomic status.  
6  
7  
8

9 **Acknowledgement** Authors wish to thank Department of Census and Statistics in Sri  
10  
11 Lanka for granting permission to access DHS data.  
12  
13  
14

15 **Author Contributions** All authors have substantially contributed to this manuscript.  
16  
17 Gayathri Abeywickrama (GA) designed, prepared the dataset and conducted the  
18  
19 statistical analysis under the supervision of Sabu Padmadas (SP) and Andrew Hinde  
20  
21 (AH). GA prepared the initial draft of the paper. SP and AH revised the paper for  
22  
23 intellectual content and contributed to preparing the final draft of the paper for  
24  
25 submission.  
26  
27

28 **Funding** None to declare  
29  
30  
31

32 **Competing Interests** None  
33  
34  
35

36 **Ethical Approval** Ethical approval was granted from the Ethics Research and  
37  
38 Governance unit of the University of Southampton (reference: 42179).  
39  
40  
41

42 **Patient and Public Involvement.** This research was done without patient or public  
43  
44 involvement. Patients were not invited to comment on the study design and were not  
45  
46 consulted to develop patient relevant outcomes or interpret the results. Patients were  
47  
48 not invited to contribute to the writing or editing of this document for readability or  
49  
50 accuracy.  
51  
52  
53

54 **Data availability.** The data are not publicly available but can be obtained through  
55  
56 written request to the Department of Census and Statistics in Sri Lanka  
57  
58  
59  
60

**Figure legends**

Figure 1. Percentage of babies with low birth weight in Sri Lanka: 1990-2017

Figure 2a. Concentration curve showing the cumulative proportion of low birth weight by wealth quintiles

Figure 2b. Concentration curves showing the cumulative proportion of low birth weight by residential sector

For peer review only

## References

1. Department of Census and Statistics. *Demographic and Health Survey 2016*. Colombo: Department of Census and Statistics, Sri Lanka, 2017.
2. World Bank. *Sri Lanka: Attaining the Millennium Development Goals in Sri Lanka*. Washington DC: World Bank Human Development Unit, South Asia Region, 2005. <https://openknowledge.worldbank.org/bitstream/handle/10986/8635/321340LK.pdf?sequence=1&isAllowed=y> [accessed 10 June 2019].
3. World Health Organization. *Paradox of Healthcare in Sri Lanka: a Snapshot of the Last Decade from a Partnership of Sixty Years*. Colombo: World Health Organization. 2014. <https://apps.who.int/iris/bitstream/handle/10665/255195/ParadoxofhealthcareinSri%20Lanka.pdf?sequence=1&isAllowed=y> [accessed 10 June 2019].
4. World Health Organization. *Global Nutrition Targets 2025: Low Birth Weight Policy Brief*. Geneva: World Health Organization, 2014. [https://www.who.int/nutrition/topics/globaltargets\\_lowbirthweight\\_policybrief.pdf](https://www.who.int/nutrition/topics/globaltargets_lowbirthweight_policybrief.pdf) [accessed 10 April 2019].
5. Barker DJP. *Mothers, Babies and Health in Later Life* (2nd ed.). Edinburgh: Churchill Livingstone, 1998.
6. Hack M, Klein NK, Taylor HG. Long-term developmental outcomes of low birth weight infants. *The Future Children* 1995, 5: 176-96. doi:10.2307/1602514
7. Khan A, Nasrullah FD, Jaleel R. Frequency and risk factors of low birth weight in term pregnancy. *Pakistan Journal of Medical Sciences* 2006, 32: 138-42. doi:10.12669/pjms.321.8120
8. Kramer MS. Determinants of low birth weight: methodological assessment and meta-analysis. *Bulletin of the World Health Organization* 1987, 65: 663-737. doi:1987;65(5):663-737
9. Fall CHD. Fetal programming and the risk of noncommunicable disease. *Indian Journal of Pediatrics* 2013, 80 Supplement: S13-S20. doi:<https://doi.org/10.1007/s12098-012-0834-5>
10. Sivasankaran S, Thankappan KR. Prevention of non-communicable diseases requires a life course approach: a case study from Kerala. *Indian Journal of Medical Research* 2013, 137: 874-7. PMID: 23760370; PMCID: PMC3734676
11. Mahumud RA, Sultana M, Sarker AR. *Distribution and determinants of low birth weight in developing countries*. *Journal of Preventive Medicine and Public Health* 2017, 50: 18-28. doi:10.3961/jpmph.16.087.
12. Leon DA, Moser KA. Low birth weight persists in South Asian babies born in England and Wales regardless of maternal country of birth. Slow pace of acculturation, physiological constraint or both? Analysis of routine data. *Journal of Epidemiology and Community Health* 2012, 66: 544-51.



- 1  
2  
3  
4  
5  
6  
7  
8  
9  
10  
11  
12  
13  
14  
15  
16  
17  
18  
19  
20  
21  
22  
23  
24  
25  
26  
27  
28  
29  
30  
31  
32  
33  
34  
35  
36  
37  
38  
39  
40  
41  
42  
43  
44  
45  
46  
47  
48  
49  
50  
51  
52  
53  
54  
55  
56  
57  
58  
59  
60
13. Bian Y, Zhang Z, Liu Q, Wu D, Wang S. Maternal risk factors for low birth weight for term births in a developed region in China: a hospital-based study of 55,633 pregnancies. *Journal of Biomedical Research* 2013, 27(1): 14-22.  
doi: 10.7555/JBR.27.20120046
  14. Dahlui M, Azahar N, Oche OM, Aziz NA. Risk factors for low birth weight in Nigeria: evidence from the 2013 Nigeria Demographic and Health Survey. *Global Health Action* 2016, 9:1.  
doi: 10.3402/gha.v9.28822
  15. Kader M, Perera NK. Socio-economic and nutritional determinants of low birth weight in India. *North American Journal of Medical Science* 2014, 6: 302-8.  
doi: 10.4103/1947-2714.136902
  16. Ministry of Health Nutrition and Indigenous Medicine. *Annual Health Bulletin Sri Lanka*. Colombo: Ministry of Health, Nutrition and Indigenous Medicine, 2015.
  17. Rajapaksa, LC, Arambepola C, Gunawardena N. *Nutritional Status in Sri Lanka, Determinants and Interventions: a Desk Review*. Colombo: UNICEF, 2011.  
[http://files.unicef.org/srilanka/2012\\_SL\\_Nutri\\_Desk\\_review.pdf](http://files.unicef.org/srilanka/2012_SL_Nutri_Desk_review.pdf) [accessed 10 June 2019].
  18. Perera PJ, Ranathunga N, Fernando MP, Warnakulasuriya TD, Wickremasinghe RA. Growth parameters at birth of babies born in Gampaha district, Sri Lanka and factors influencing them. *World Health Organization South-East Asia Journal of Public Health* 2013, 2: 57-62.
  19. Jayawardena P. Underlying causes of child and maternal nutrition in the estate sector of Sri Lanka. *Journal of South Asian Studies* 2014, 2: 241-55.
  20. Anuranga C, Wickmamasinghe R, Rannan-Eliya R, Hossain SMM, Abeykoon ATPL. Trends, inequalities and determinants of low birth weight in Sri Lanka. *Ceylon Medical Journal* 2012, 57: 61-9.
  21. Department of Census and Statistics. *Population and Housing Census Final Report*. Colombo: Department of Census and Statistics, 2012.  
<http://www.statistics.gov.lk/PopHouSat/CPH2011/Pages/Activities/Reports/FinalReport/FinalReport.pdf> [accessed 05 Sep 2019].
  22. World Health Organization. *WHO Multicentre Growth Reference Study Group. WHO Child Growth Standards: Length/Height-for-Age, Weight-for-Age, Weight-for-Length, Weight-for-Height and Body Mass Index-for-Age: Methods and Development*. Geneva: World Health Organization, 2006.
  23. Winkvist A, Rasmussen KM, Habich JP. A new definition of maternal depletion syndrome. *American Journal of Public Health* 1992, 82: 691-694  
doi:doi.org/10.2105/AJPH.82.5.691
  24. King JC. The risk of maternal nutritional depletion and poor outcomes increases in early or closely spaced pregnancies. *Journal of Nutrition* 2013, 133(supplement): 1,732s-17326s.  
doi: <https://doi.org/10.1093/jn/133.5.1732S>

- 1  
2  
3 25 Shell-Duncan B, Yung S. The maternal depletion transition in northern Kenya: the  
4 effects of settlement, development and disparity. *Social Science and Medicine* 2004, 58:  
5 2,485-98.  
6 doi: <https://doi.org/10.1016/j.socscimed.2003.09.016>  
7  
8 26 O'Donnell O, van Doorslaer E, Wagstaff A, Lindelow M. *Analyzing Health Equity Using*  
9 *Household Survey Data.*: Washington, DC, 2008.  
10  
11 27 Sri Lanka Thripasha Limited. *Nutrient Content*, 2016. Available from:  
12 <http://www.thripasha.lk/thripasha-production/nutrient-content/> [accessed 10 Oct  
13 2019].  
14  
15 28 Rannan-Eliya R. Understanding the Paradox of Undernutrition in Sri Lanka. Paper  
16 presented at the International Conference on Maternal and Child Nutrition, Colombo,  
17 23-24 November 2015.  
18  
19 29 Damayanthi MKN, Champika PAJ. *An Evaluation of Samurdhi Banks in Poverty*  
20 *Alleviation* (Research Report no. 165). Colombo: Hector Kobbekaduwa Agrarian  
21 Research and Training Institute, 2014.  
22 [http://www.harti.gov.lk/images/download/reasearch\\_report/new1/165.pdf](http://www.harti.gov.lk/images/download/reasearch_report/new1/165.pdf) [accessed 10  
23 June 2019].  
24  
25 30 Center for Public Impact. *The Samurdhi Programme in Sri Lanka*, 2019. Available from:  
26 <https://www.centreforpublicimpact.org/case-study/samurdhi-programme-sri-lanka/>  
27 [accessed 23 Oct 2019].  
28  
29 31 Channon AS, Padmadas SS, McDonald J. Measuring birth weight in developing  
30 countries: does the method of reporting in retrospective surveys matter? *Maternal and*  
31 *Child Health Journal* 2011, 15: 12-18.  
32 doi:<https://doi.org/10.1007/s10995-009-0553-3>  
33  
34 32 Blencowe H, Krusevec J, de Onis M, Black RE, An X, Stevens GA, et al. National, regional,  
35 and worldwide estimates of low birthweight in 2015, with trends from 2000: a  
36 systematic analysis. *The Lancet Global Health* 2019, 7: e849-e860.  
37 doi: [https://doi.org/10.1016/S2214-109X\(18\)30565-5](https://doi.org/10.1016/S2214-109X(18)30565-5)  
38  
39  
40  
41  
42  
43  
44  
45  
46  
47  
48  
49  
50  
51  
52  
53  
54  
55  
56  
57  
58  
59  
60

1  
2  
3 **Figure 1**  
4 **Percentage of babies with low birth weight in Sri Lanka: 1990-2017**  
5  
6  
7  
8  
9

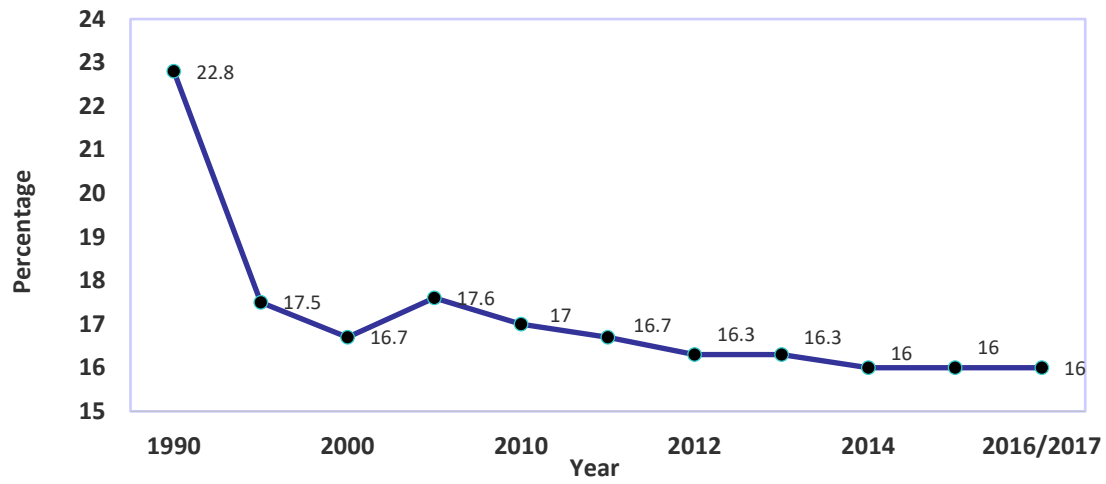

Data source: Department of Census and Statistics<sup>1</sup>

review only

**Figure 2**  
**Concentration curves showing the cumulative proportion of low birth weight**

**(a) By wealth quintile**

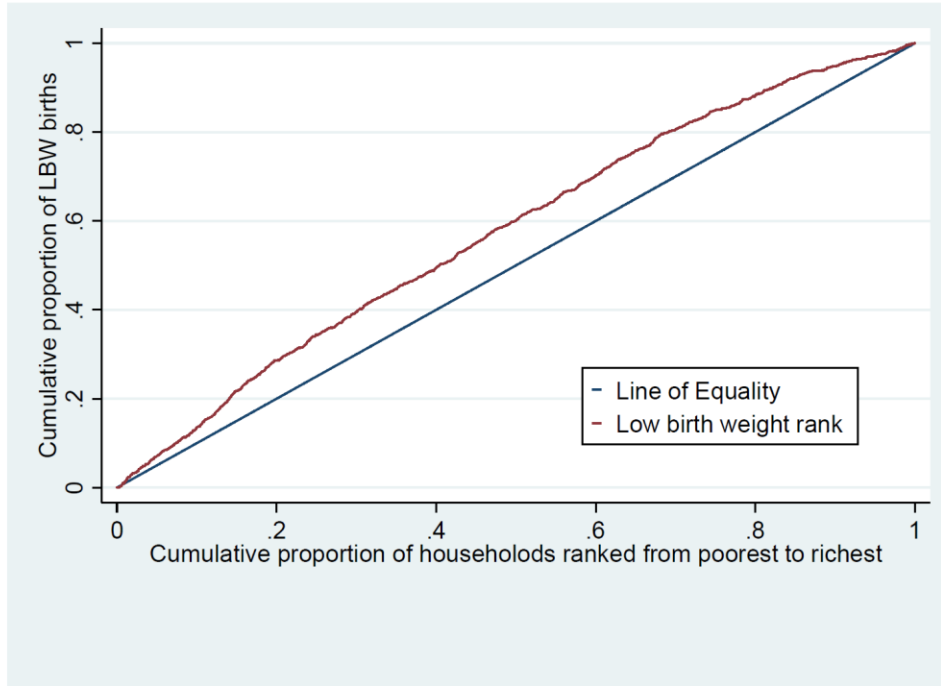

**(b) By residential sector**

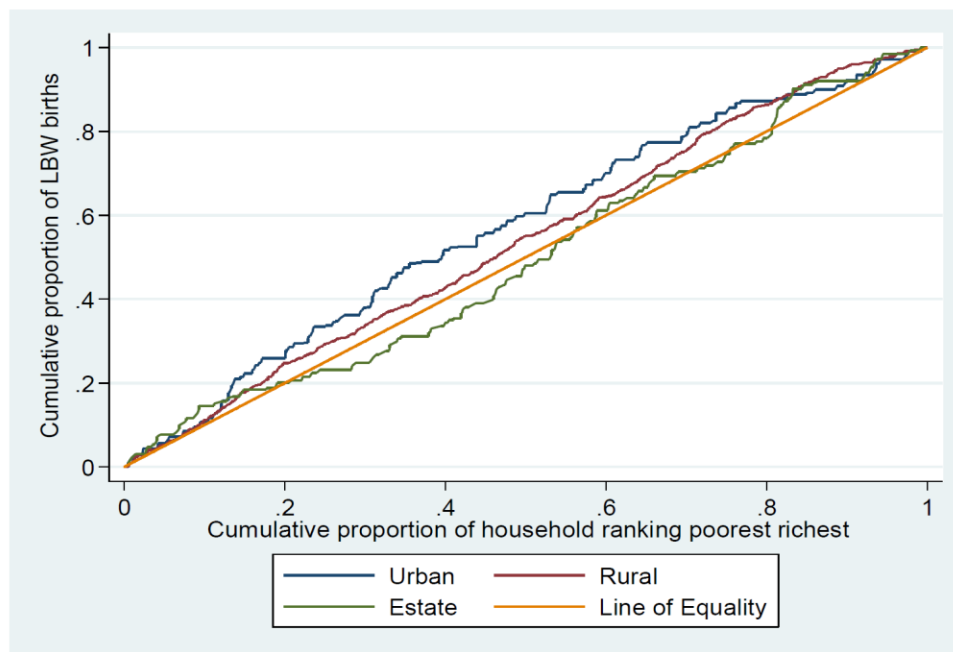

## STROBE 2007 (v4) Statement—Checklist of items that should be included in reports of cross-sectional studies

Title of the study: **Social inequalities in low birth weight outcomes in Sri Lanka: evidence from the Demographic and Health Survey 2016**

| Section/Topic                | Item # | Recommendation                                                                                                                                                                       | Reported on page # |
|------------------------------|--------|--------------------------------------------------------------------------------------------------------------------------------------------------------------------------------------|--------------------|
| Title and abstract           | 1      | (a) Indicate the study's design with a commonly used term in the title or the abstract                                                                                               | 1                  |
|                              |        | (b) Provide in the abstract an informative and balanced summary of what was done and what was found                                                                                  | 2                  |
| <b>Introduction</b>          |        |                                                                                                                                                                                      |                    |
| Background/rationale         | 2      | Explain the scientific background and rationale for the investigation being reported                                                                                                 | 4-5                |
| Objectives                   | 3      | State specific objectives, including any prespecified hypotheses                                                                                                                     | 5                  |
| <b>Methods</b>               |        |                                                                                                                                                                                      |                    |
| Study design                 | 4      | Present key elements of study design early in the paper                                                                                                                              | 5-8                |
| Setting                      | 5      | Describe the setting, locations, and relevant dates, including periods of recruitment, exposure, follow-up, and data collection                                                      | 5-6                |
| Participants                 | 6      | (a) Give the eligibility criteria, and the sources and methods of selection of participants                                                                                          | 5-6                |
| Variables                    | 7      | Clearly define all outcomes, exposures, predictors, potential confounders, and effect modifiers. Give diagnostic criteria, if applicable                                             | 6-7                |
| Data sources/<br>measurement | 8*     | For each variable of interest, give sources of data and details of methods of assessment (measurement). Describe comparability of assessment methods if there is more than one group | 6-7                |
| Bias                         | 9      | Describe any efforts to address potential sources of bias                                                                                                                            | 6                  |
| Study size                   | 10     | Explain how the study size was arrived at                                                                                                                                            | 5-6                |
| Quantitative variables       | 11     | Explain how quantitative variables were handled in the analyses. If applicable, describe which groupings were chosen and why                                                         | 6-8                |
| Statistical methods          | 12     | (a) Describe all statistical methods, including those used to control for confounding                                                                                                | 7-8                |
|                              |        | (b) Describe any methods used to examine subgroups and interactions                                                                                                                  | 8-11               |

|                          |     |                                                                                                                                                                                                              |                |
|--------------------------|-----|--------------------------------------------------------------------------------------------------------------------------------------------------------------------------------------------------------------|----------------|
|                          |     | (c) Explain how missing data were addressed                                                                                                                                                                  | Not applicable |
|                          |     | (d) If applicable, describe analytical methods taking account of sampling strategy                                                                                                                           | 5              |
|                          |     | (e) Describe any sensitivity analyses                                                                                                                                                                        | Not applicable |
| <b>Results</b>           |     |                                                                                                                                                                                                              |                |
| Participants             | 13* | (a) Report numbers of individuals at each stage of study—eg numbers potentially eligible, examined for eligibility, confirmed eligible, included in the study, completing follow-up, and analysed            | 6              |
|                          |     | (b) Give reasons for non-participation at each stage                                                                                                                                                         | Not applicable |
|                          |     | (c) Consider use of a flow diagram                                                                                                                                                                           | Not applicable |
| Descriptive data         | 14* | (a) Give characteristics of study participants (eg demographic, clinical, social) and information on exposures and potential confounders                                                                     | 8-11           |
|                          |     | (b) Indicate number of participants with missing data for each variable of interest                                                                                                                          | Not applicable |
| Outcome data             | 15* | Report numbers of outcome events or summary measures                                                                                                                                                         | 8-11           |
| Main results             | 16  | (a) Give unadjusted estimates and, if applicable, confounder-adjusted estimates and their precision (eg, 95% confidence interval). Make clear which confounders were adjusted for and why they were included | 11-17          |
|                          |     | (b) Report category boundaries when continuous variables were categorized                                                                                                                                    | 9-10           |
|                          |     | (c) If relevant, consider translating estimates of relative risk into absolute risk for a meaningful time period                                                                                             | Not applicable |
| Other analyses           | 17  | Report other analyses done—eg analyses of subgroups and interactions, and sensitivity analyses                                                                                                               | Not applicable |
| <b>Discussion</b>        |     |                                                                                                                                                                                                              |                |
| Key results              | 18  | Summarise key results with reference to study objectives                                                                                                                                                     | 17             |
| Limitations              | 19  | Discuss limitations of the study, taking into account sources of potential bias or imprecision. Discuss both direction and magnitude of any potential bias                                                   | 19             |
| Interpretation           | 20  | Give a cautious overall interpretation of results considering objectives, limitations, multiplicity of analyses, results from similar studies, and other relevant evidence                                   | 17-19          |
| Generalisability         | 21  | Discuss the generalisability (external validity) of the study results                                                                                                                                        | 19-20          |
| <b>Other information</b> |     |                                                                                                                                                                                                              |                |
| Funding                  | 22  | Give the source of funding and the role of the funders for the present study and, if applicable, for the original study on which the present article is based                                                | 20             |

\*Give information separately for cases and controls in case-control studies and, if applicable, for exposed and unexposed groups in cohort and cross-sectional studies.

For peer review only

1  
2  
3  
4  
5  
6  
7  
8  
9  
10  
11  
12  
13  
14  
15  
16  
17  
18  
19  
20  
21  
22  
23  
24  
25  
26  
27  
28  
29  
30  
31  
32  
33  
34  
35  
36  
37  
38  
39  
40  
41  
42  
43  
44  
45  
46  
47
